# Supplementary material for: Synthesis and Structural Characterization of Novel Dimers of Dipyridothiazine as Promising Antiproliferative Agents
Source: MDPI journal article supplement (doi:10.3390/molecules28227662), 2023-11-19

# Supplementary Material

## Synthesis and Structural Characterization of Novel Dimers of Dipyridothiazine as Promising Antiproliferative Agents #

Emilia Martula <sup>1</sup>, Beata Morak-Młodawska <sup>2\*</sup>, Malgorzata Jeleń <sup>2</sup>, Patrick N.

Okechukwu <sup>3</sup>, Abbirami Balachandran <sup>3</sup>, Prethika Tehirunavukarasu <sup>3</sup>, Kirthani

Anamalay <sup>3</sup>, Vaidehi Ulaganathan <sup>4</sup>

<sup>1</sup> Doctoral School of The Medical University of Silesia, Poland, d201074@365.sum.edu.pl

<sup>2</sup> Department of Organic Chemistry, Faculty of Pharmaceutical Sciences, The Medical University of Silesia, Jagiellońska 4, 41-200 Sosnowiec, Poland; bmlodawska@sum.edu.pl (B.M.M.); manowak@sum.edu.pl (M.J.)

<sup>3</sup> Department of Biotechnology, Faculty of Applied Sciences, UCSI University, Cheras, Kuala Lumpur 56000, Selangor, Malaysia; patrickn@ucsiuniversity.edu.my (P.N.O); 1001233455@ucsiuniversity.edu.my (A. B), kirthani12@hotmail.com (K. A), prethika18@gmail.com (P. T)

<sup>4</sup> Department of Food Science and Nutrition, Faculty of Applied Sciences, UCSI University, Cheras, Kuala Lumpur 56000, Selangor, Malaysia; vaidehi@ucsiuniversity.edu.my (V.U)

### Content

|                                                                                                              |    |
|--------------------------------------------------------------------------------------------------------------|----|
| 1. NMR spectra and HR MS of 1,2-bis((dipyrido[2,3-b:2',3'-e][1,4]thiazin-10-yl)methyl)benzene ( <b>1a</b> )  | 2  |
| 2. NMR spectra and HR MS of 1,4-bis((dipyrido[2,3-b:2',3'-e][1,4]thiazin-10-yl)methyl)benzene ( <b>1b</b> )  | 6  |
| 3. NMR spectra and HR MS of 2,6-bis((dipyrido[2,3-b:2',3'-e][1,4]thiazin-10-yl)methyl)pyridine ( <b>1c</b> ) | 9  |
| 4. NMR spectra and HR MS of 1,2-bis((dipyrido[3,2-b:3',4'-e][1,4]thiazin-10-yl)methyl)benzene ( <b>2a</b> )  | 11 |
| 5. NMR spectra and HR MS of 1,4-bis((dipyrido[2,3-b:2',3'-e][1,4]thiazin-10-yl)methyl)benzene ( <b>2b</b> )  | 14 |
| 6. NMR spectra and HR MS of 2,6-bis((dipyrido[3,2-b:3',4'-e][1,4]thiazin-10-yl)methyl)pyridine ( <b>2c</b> ) |    |
| 7. NMR spectra and HR MS of 1,2-bis((dipyrido[3,4-b:3',4'-e][1,4]thiazin-10-yl)methyl)benzene ( <b>3a</b> )  | 20 |
| 8. NMR spectra and HR MS of 1,4-bis((dipyrido[2,3-b:2',3'-e][1,4]thiazin-10-yl)methyl)benzene ( <b>3b</b> )  | 21 |

|                                                                                                               |    |
|---------------------------------------------------------------------------------------------------------------|----|
| 9. NMR spectra and HR MS of 2,6-bis((dipyrido[3,4-b:3',4'-e][1,4]thiazin-10-yl)methyl)pyridine ( <b>3c</b> )  | 26 |
| <sup>1</sup> H NMR of 2,6-bis((dipyrido[3,4-b:3',4'-e][1,4]thiazin-10-yl)methyl)pyridine ( <b>3c</b> )        | 26 |
| COSY NMR of 2,6-bis((dipyrido[3,4-b:3',4'-e][1,4]thiazin-10-yl)methyl)pyridine ( <b>3c</b> )                  | 27 |
| NOESY NMR of 2,6-bis((dipyrido[3,4-b:3',4'-e][1,4]thiazin-10-yl)methyl)pyridine ( <b>3c</b> )                 | 28 |
| <sup>13</sup> C NMR of 2,6-bis((dipyrido[3,4-b:3',4'-e][1,4]thiazin-10-yl)methyl)pyridine ( <b>3c</b> )       | 29 |
| HSQC NMR of 2,6-bis((dipyrido[3,4-b:3',4'-e][1,4]thiazin-10-yl)methyl)pyridine ( <b>3c</b> )                  | 31 |
| HMBC NMR of 2,6-bis((dipyrido[3,4-b:3',4'-e][1,4]thiazin-10-yl)methyl)pyridine ( <b>3c</b> )                  | 32 |
| HR MS of 2,6-bis((dipyrido[3,4-b:3',4'-e][1,4]thiazin-10-yl)methyl)pyridine ( <b>3c</b> )                     |    |
| 10. NMR spectra and HR MS of 1,2-bis((dipyrido[2,3-b:4',3'-e][1,4]thiazin-5-yl)methyl)benzene ( <b>4a</b> )   | 34 |
| 11. NMR spectra and HR MS of 1,4-bis((dipyrido[2,3-b:2',3'-e][1,4]thiazin-10-yl)methyl)benzene ( <b>4b</b> )  | 37 |
| 12. NMR spectra and HR MS of 2,6-bis((dipyrido[2,3-b:4',3'-e][1,4]thiazin-10-yl)methyl)pyridine ( <b>4c</b> ) | 39 |

NMR spectra and HR MS of 1,2-bis((dipyrido[2,3-b:2',3'-e][1,4]thiazin-10-yl)methyl)benzene (**1a**)

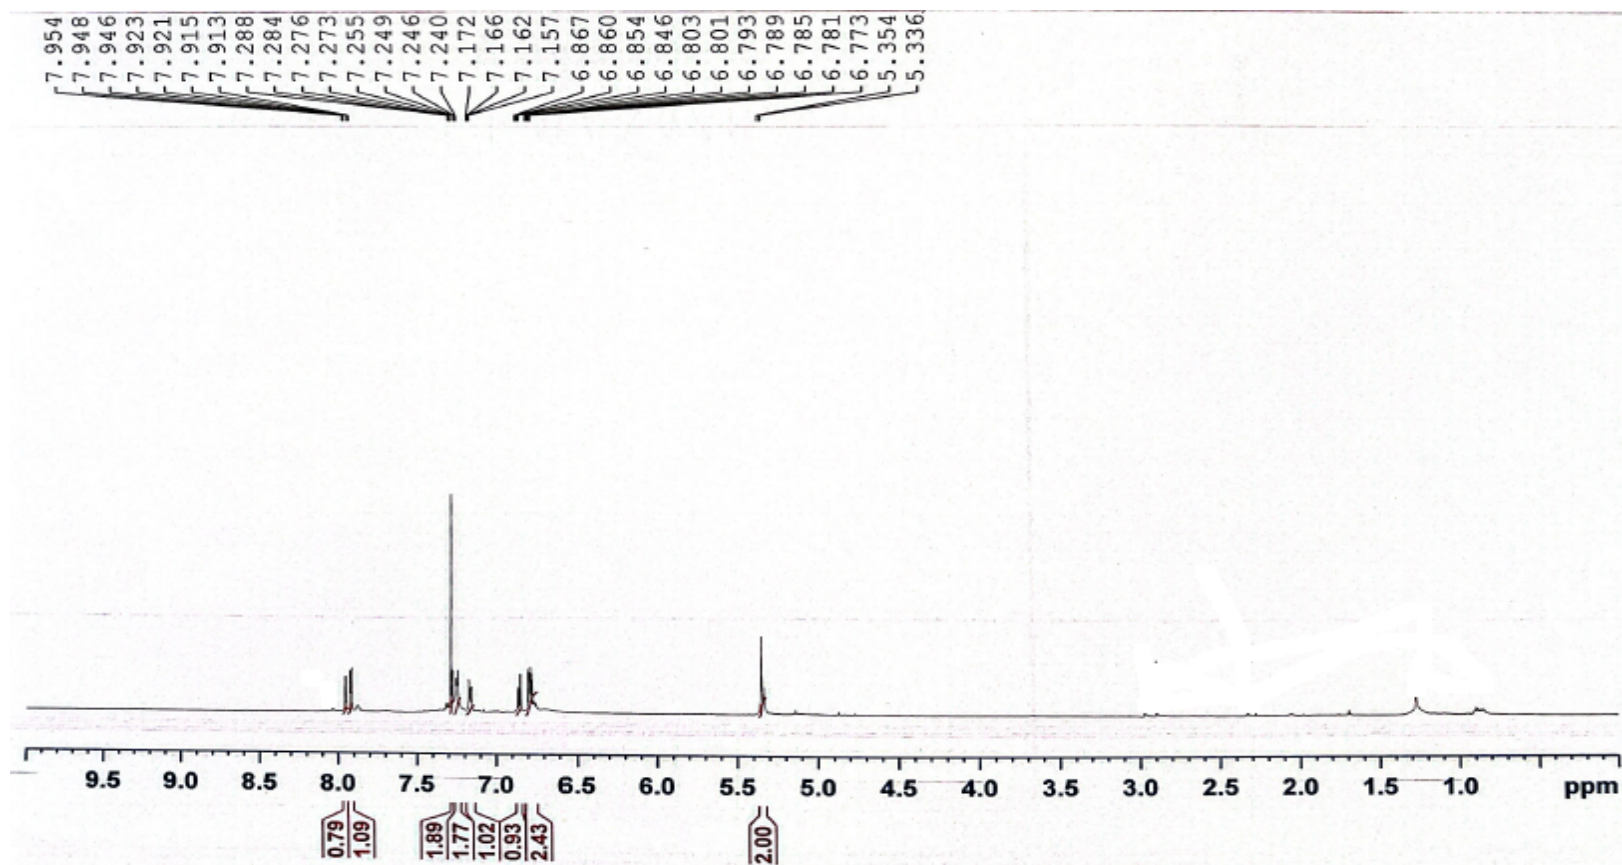

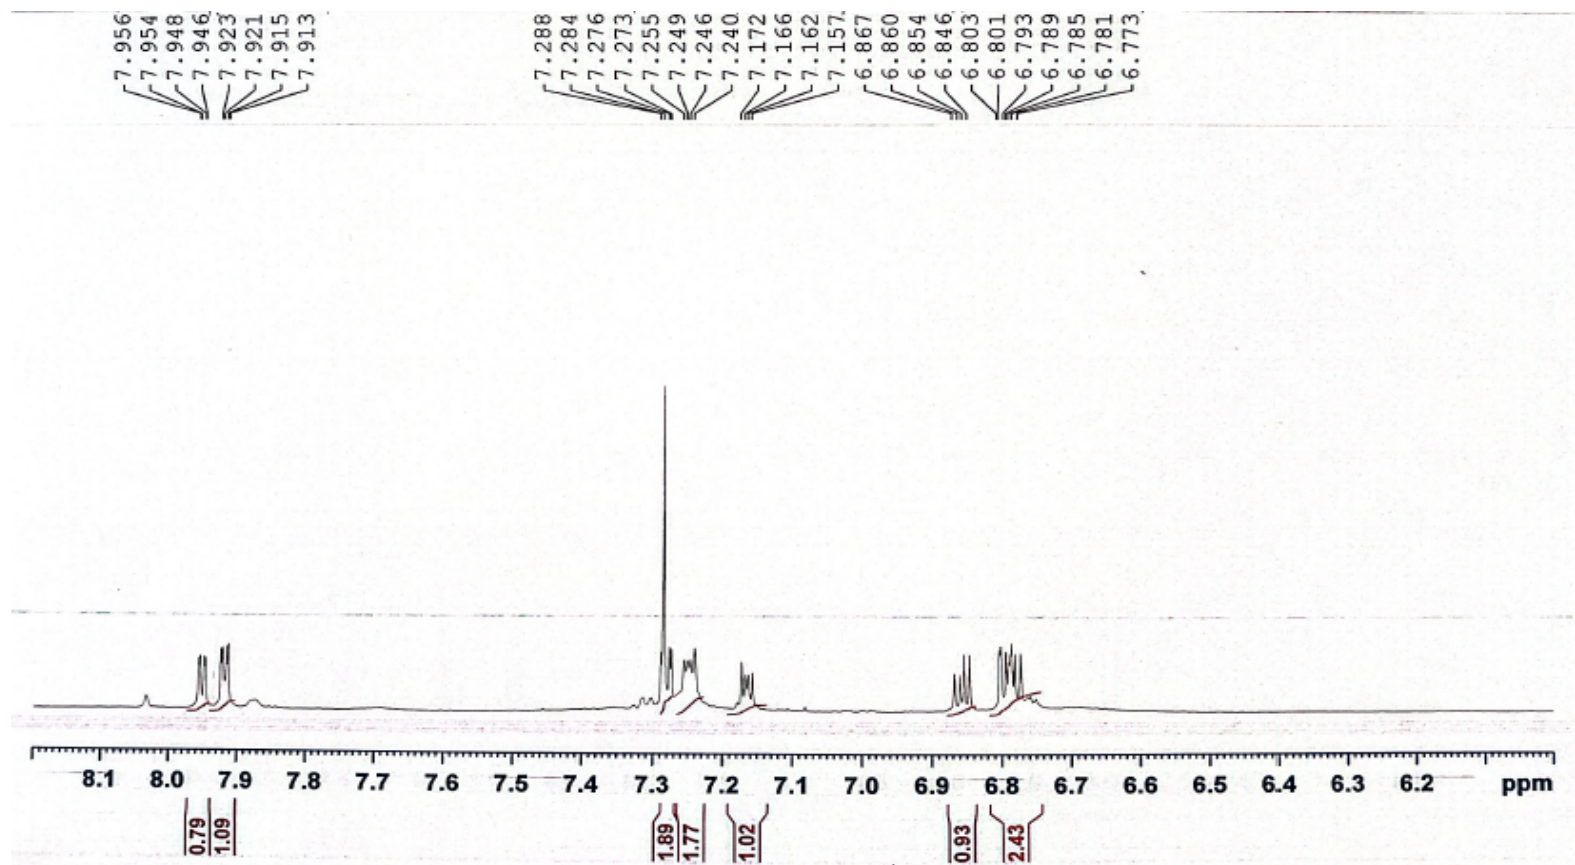

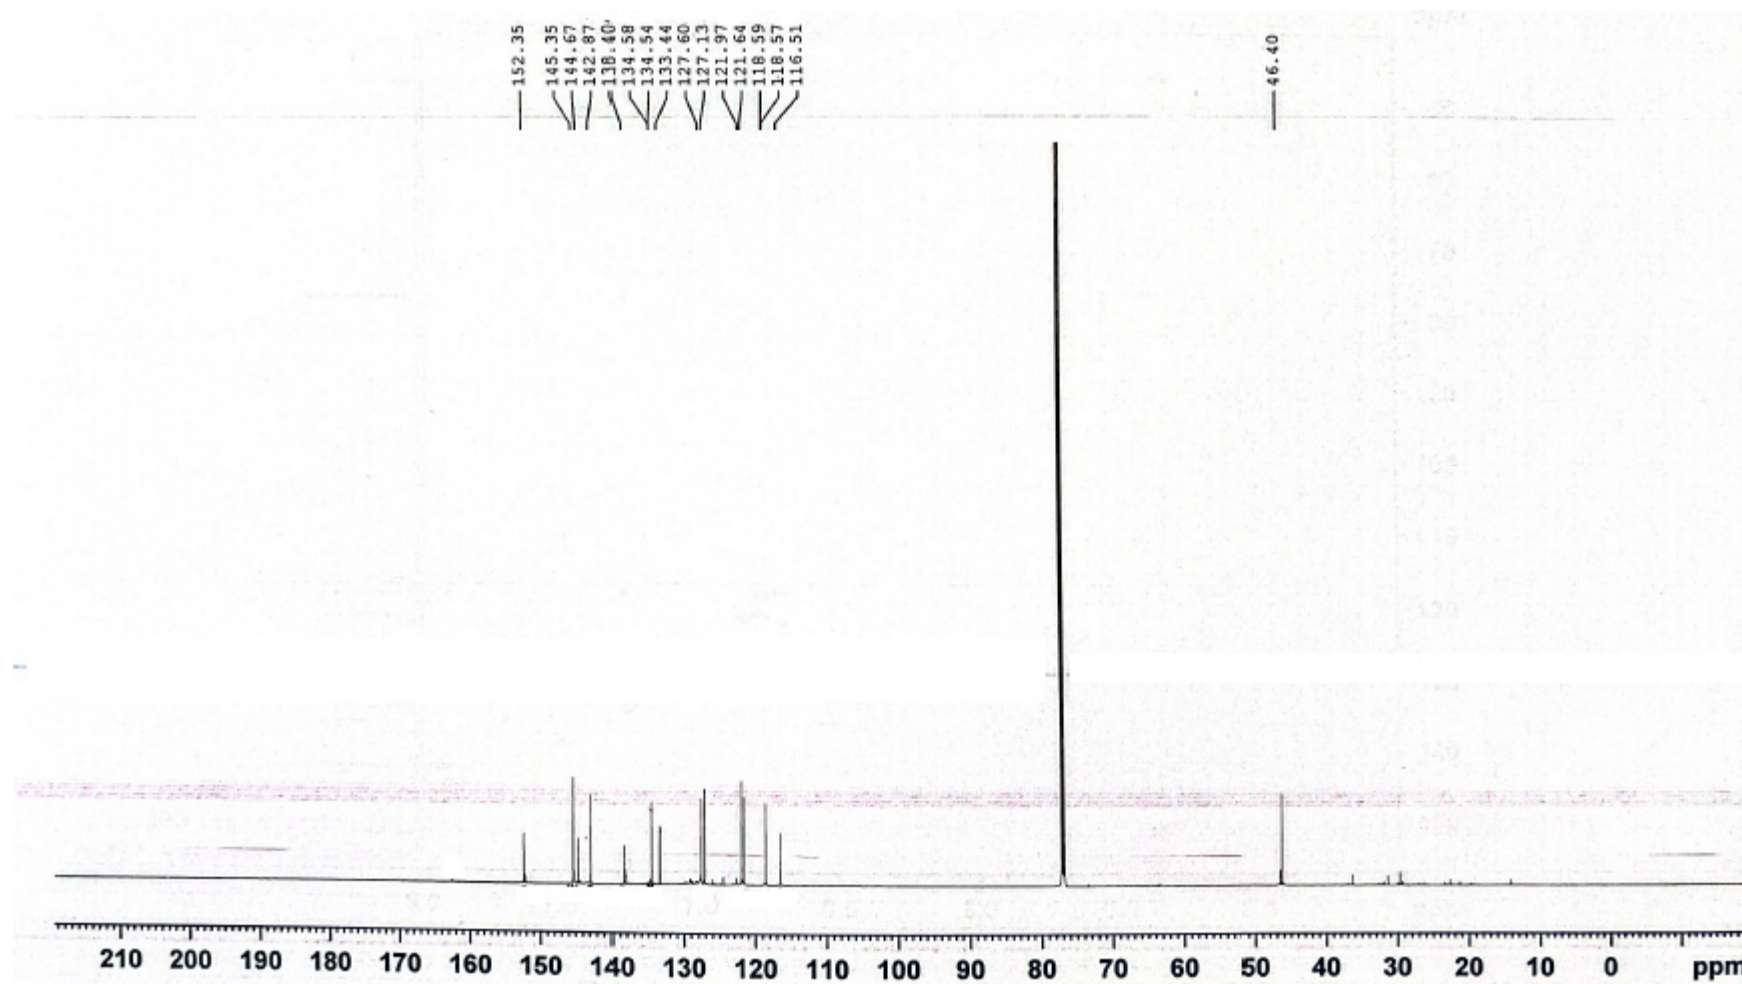

# Acquisition Parameter

|             |          |                      |          |                  |           |
|-------------|----------|----------------------|----------|------------------|-----------|
| Source Type | ESI      | Ion Polarity         | Positive | Set Nebulizer    | 0.3 Bar   |
| Focus       | Active   | Set Capillary        | 4000 V   | Set Dry Heater   | 200 °C    |
| Scan Begin  | 100 m/z  | Set End Plate Offset | -500 V   | Set Dry Gas      | 3.0 l/min |
| Scan End    | 1000 m/z | Set Charging Voltage | 2000 V   | Set Divert Valve | Source    |
|             |          | Set Corona           | 0 nA     | Set APCI Heater  | 0 °C      |

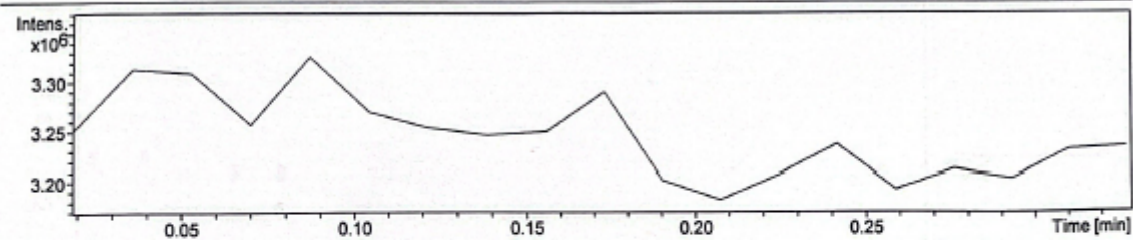

## +MS, 0.1-0.2min #3-11

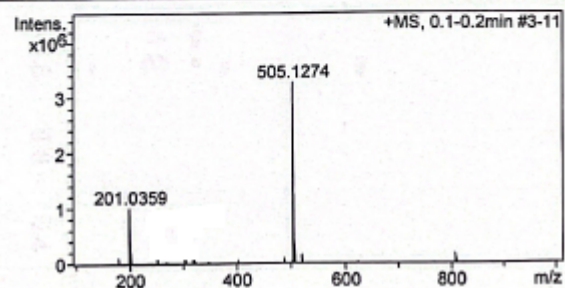



NMR spectra and HR MS of 1,4-bis((dipyrido[2,3-b:2',3'-e][1,4]thiazin-10-yl)methyl)benzene (**1b**)

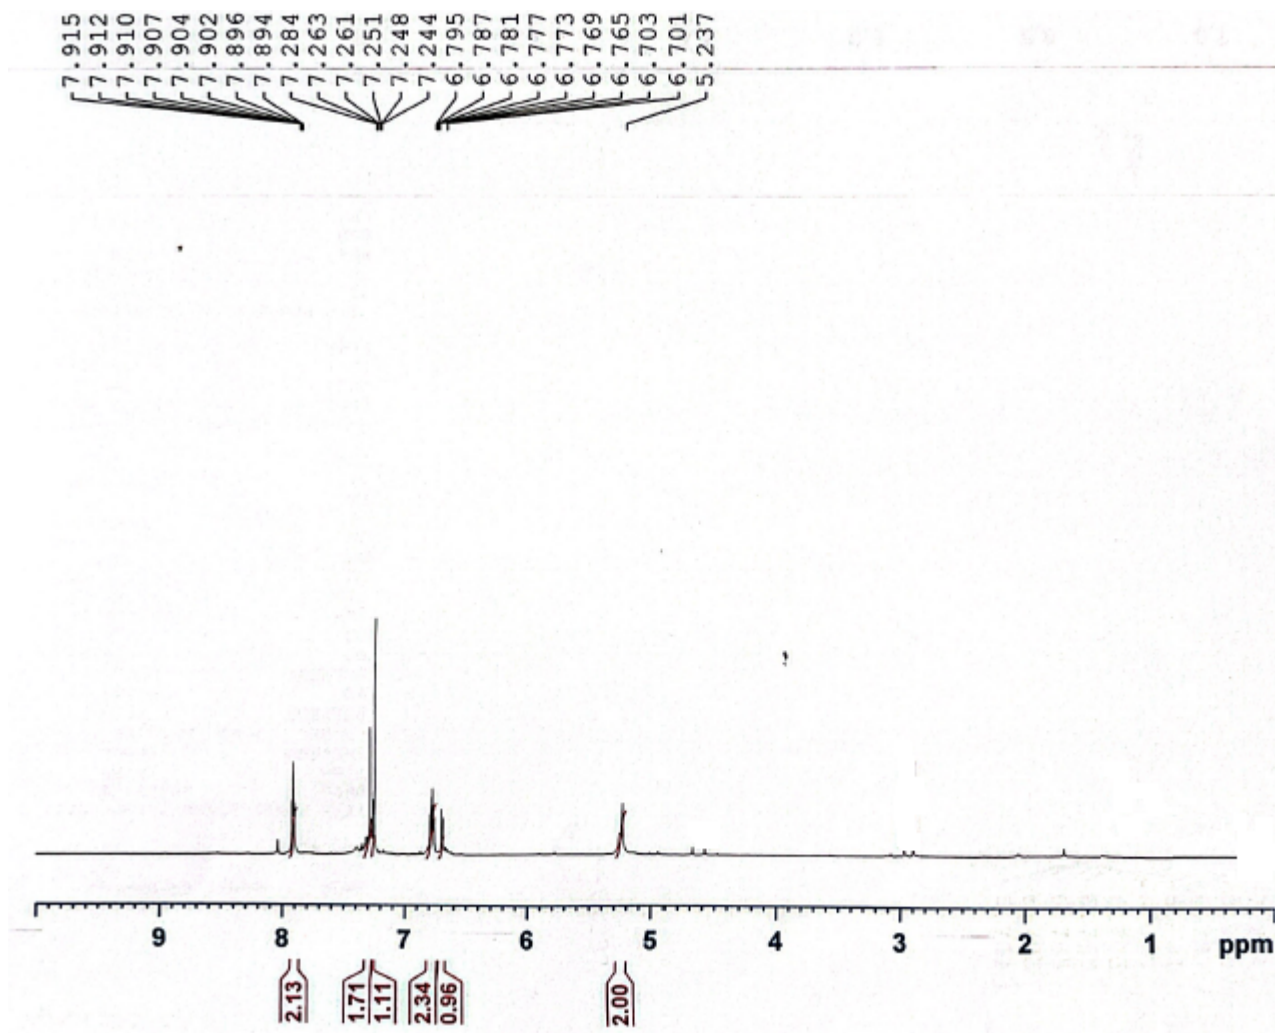

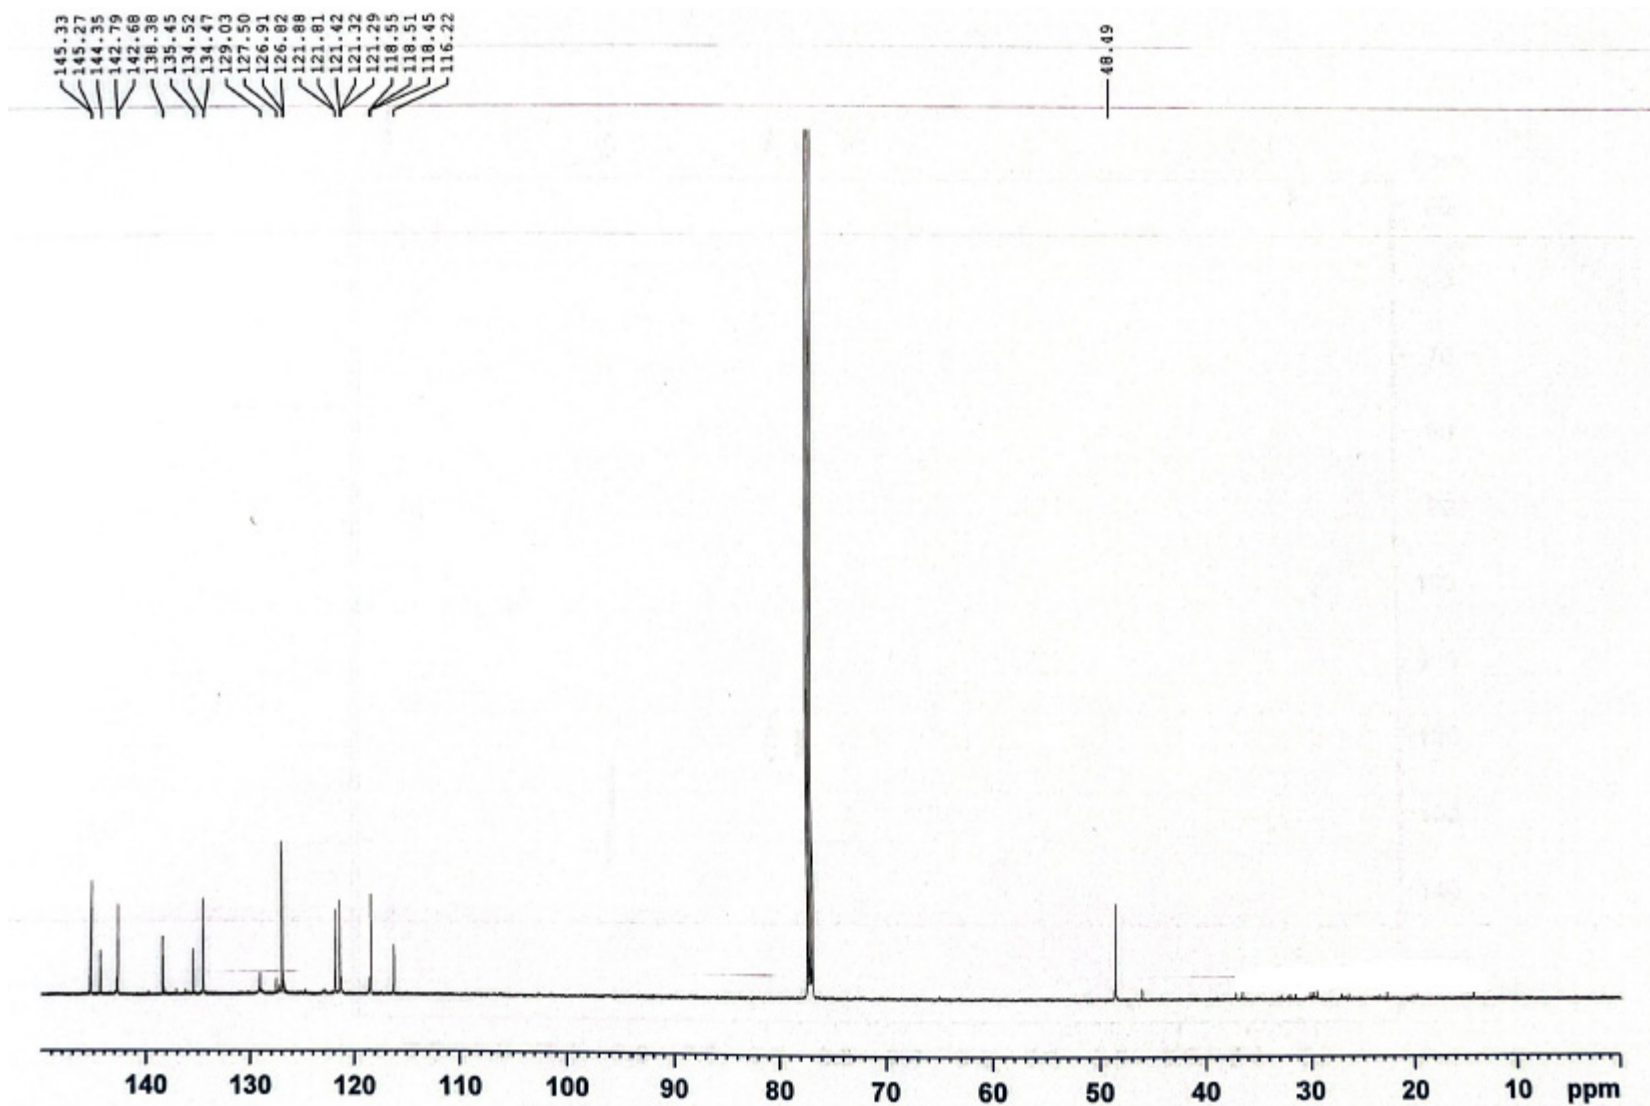



# Acquisition Parameter

|             |          |                      |          |                  |           |
|-------------|----------|----------------------|----------|------------------|-----------|
| Source Type | ESI      | Ion Polarity         | Positive | Set Nebulizer    | 0.3 Bar   |
| Focus       | Active   | Set Capillary        | 4000 V   | Set Dry Heater   | 200 °C    |
| Scan Begin  | 100 m/z  | Set End Plate Offset | -500 V   | Set Dry Gas      | 3.0 l/min |
| Scan End    | 1000 m/z | Set Charging Voltage | 2000 V   | Set Divert Valve | Source    |
|             |          | Set Corona           | 0 nA     | Set APCI Heater  | 0 °C      |

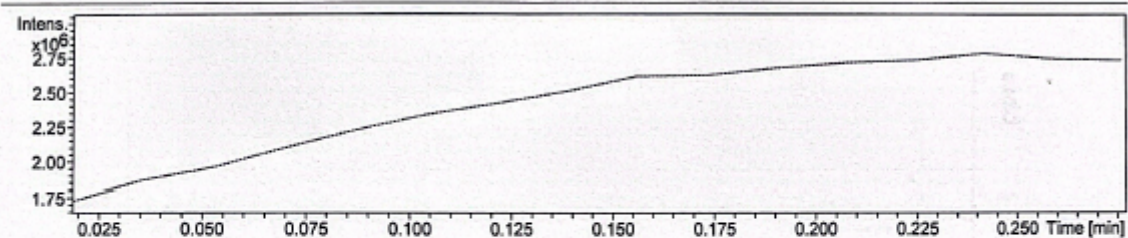

## +MS, 0.0-0.2min #2-9

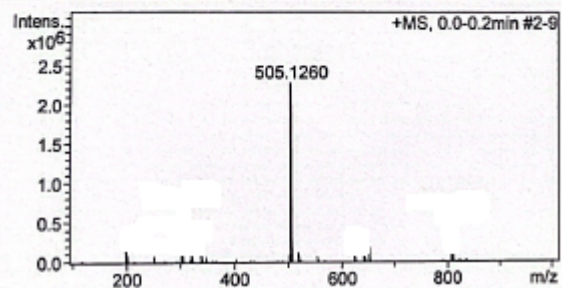

NMR spectra and HR MS of 2,6-bis((dipyrido[2,3-b:2',3'-e][1,4]thiazin-10-yl)methyl)pyridine (**1c**)

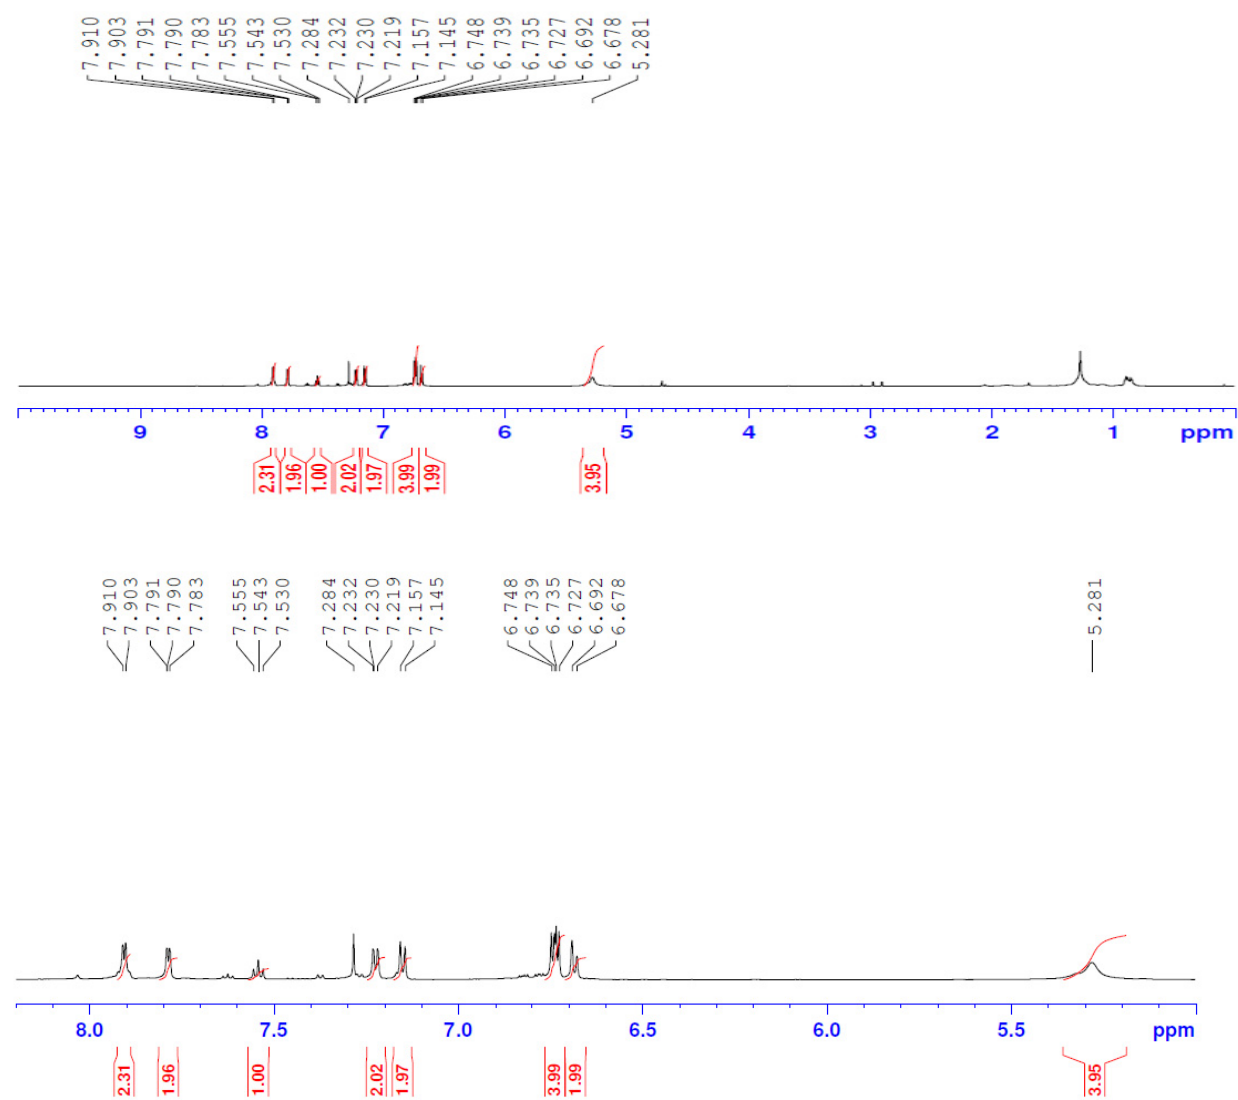

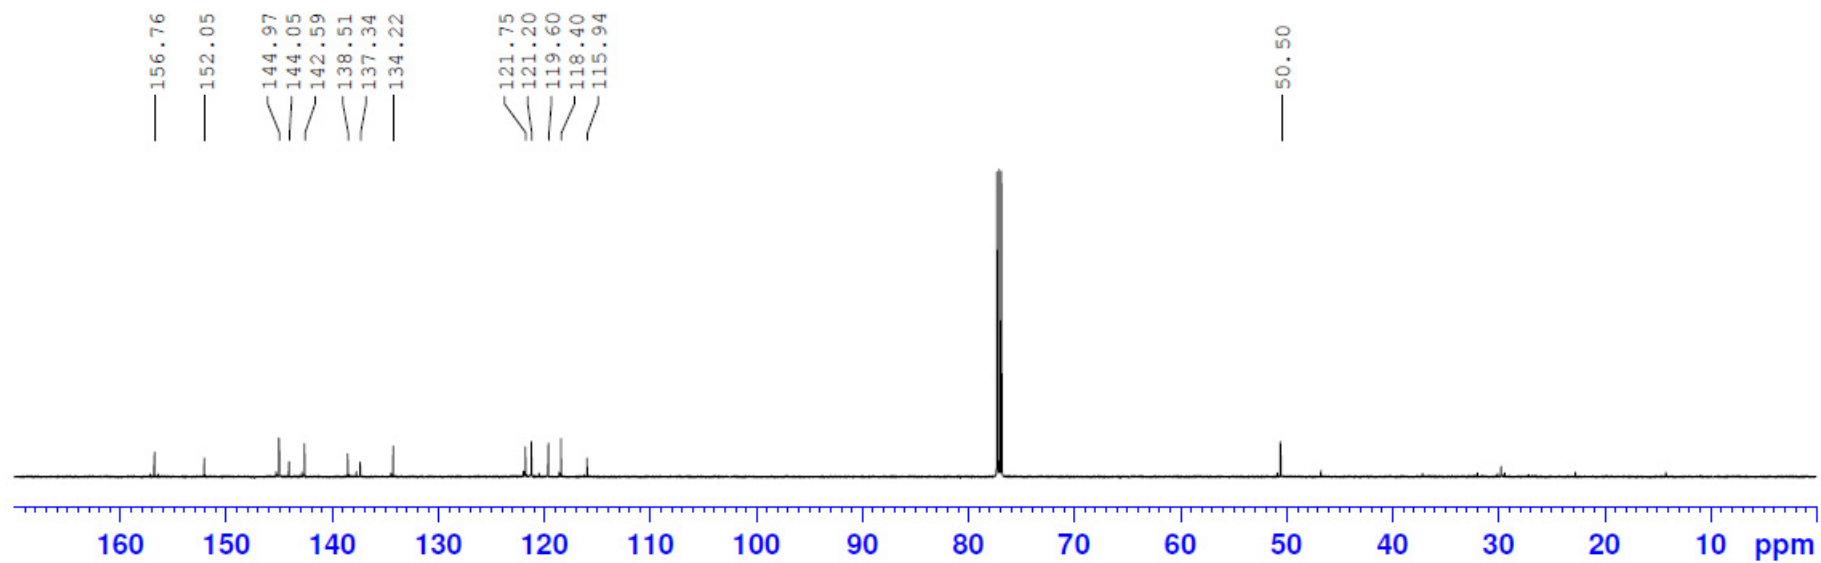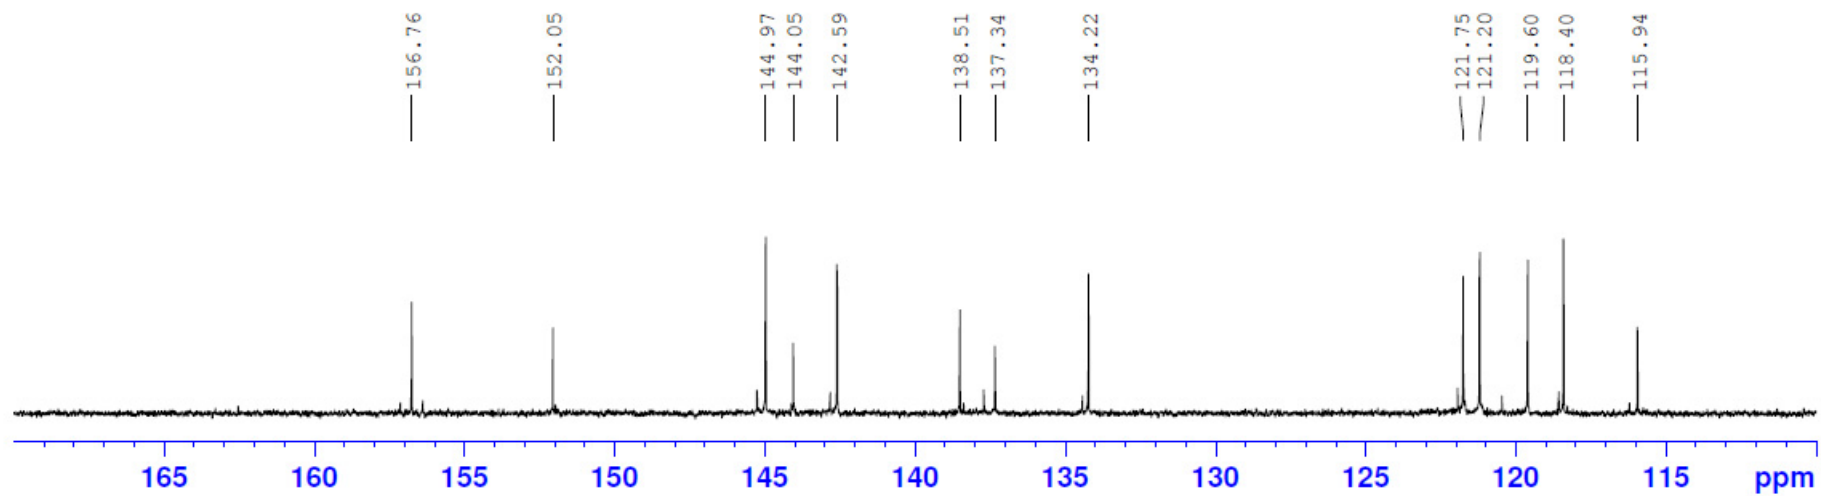

NMR spectra and HR MS of 1,2-bis((dipyrido[3,2-b:3',4'-e][1,4]thiazin-10-yl)methyl)benzene (**2a**)

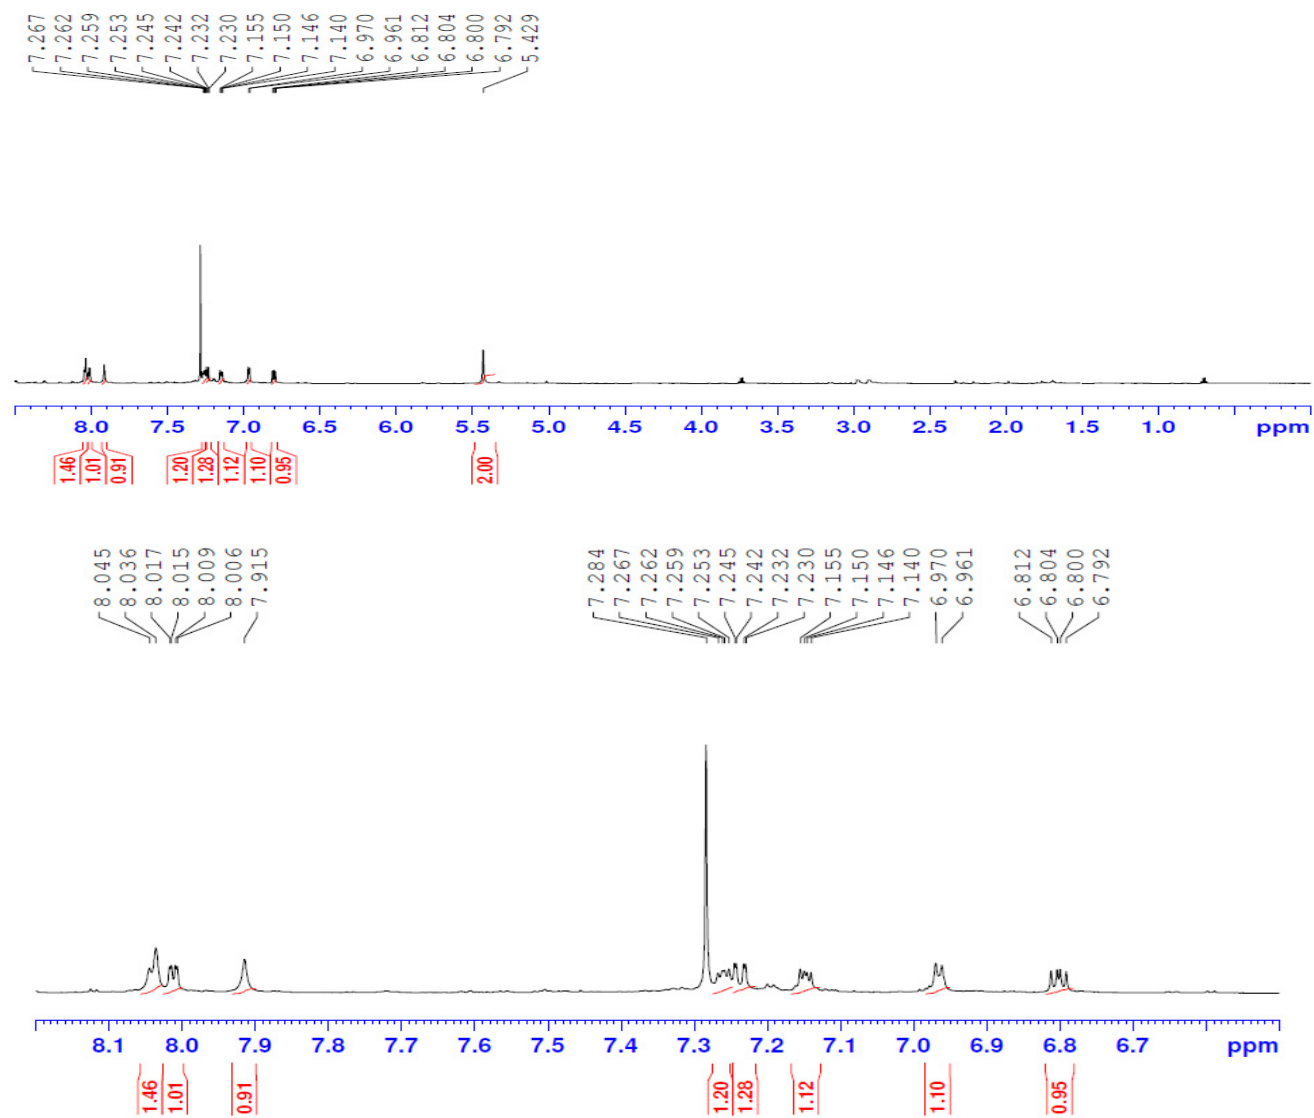

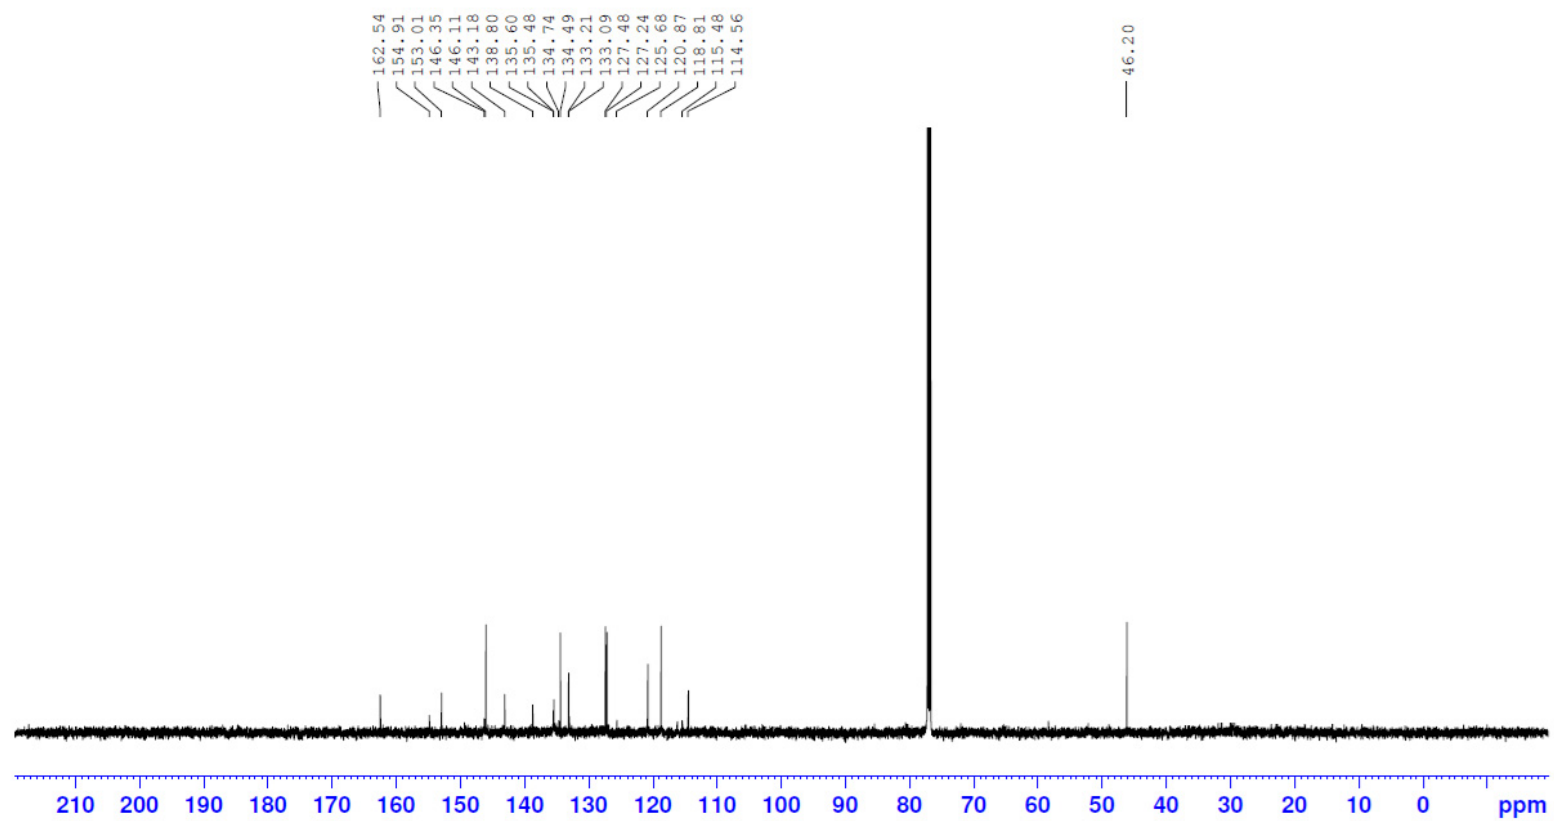

**Acquisition Parameter**

|             |          |                      |          |                  |           |
|-------------|----------|----------------------|----------|------------------|-----------|
| Source Type | ESI      | Ion Polarity         | Positive | Set Nebulizer    | 0.3 Bar   |
| Focus       | Active   | Set Capillary        | 4000 V   | Set Dry Heater   | 200 °C    |
| Scan Begin  | 100 m/z  | Set End Plate Offset | -500 V   | Set Dry Gas      | 3.0 l/min |
| Scan End    | 1000 m/z | Set Charging Voltage | 2000 V   | Set Divert Valve | Source    |
|             |          | Set Corona           | 0 nA     | Set APCI Heater  | 0 °C      |

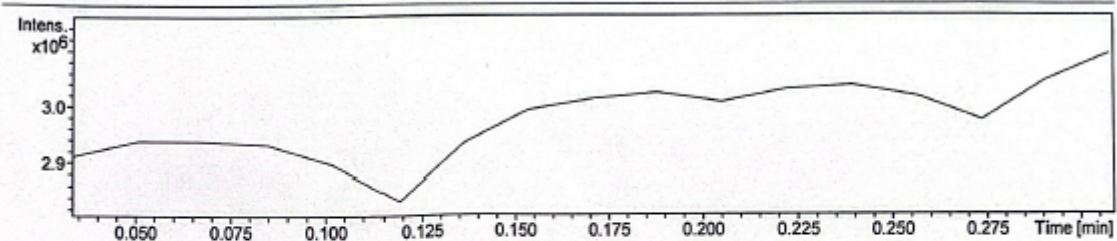**+MS, 0.1min #2**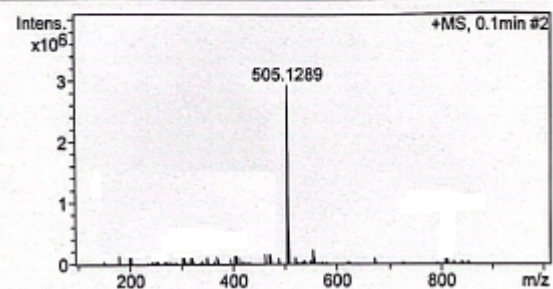



NMR spectra and HR MS of 1,4-bis((dipyrido[2,3-b:2',3'-e][1,4]thiazin-10-yl)methyl)benzene (**2b**)

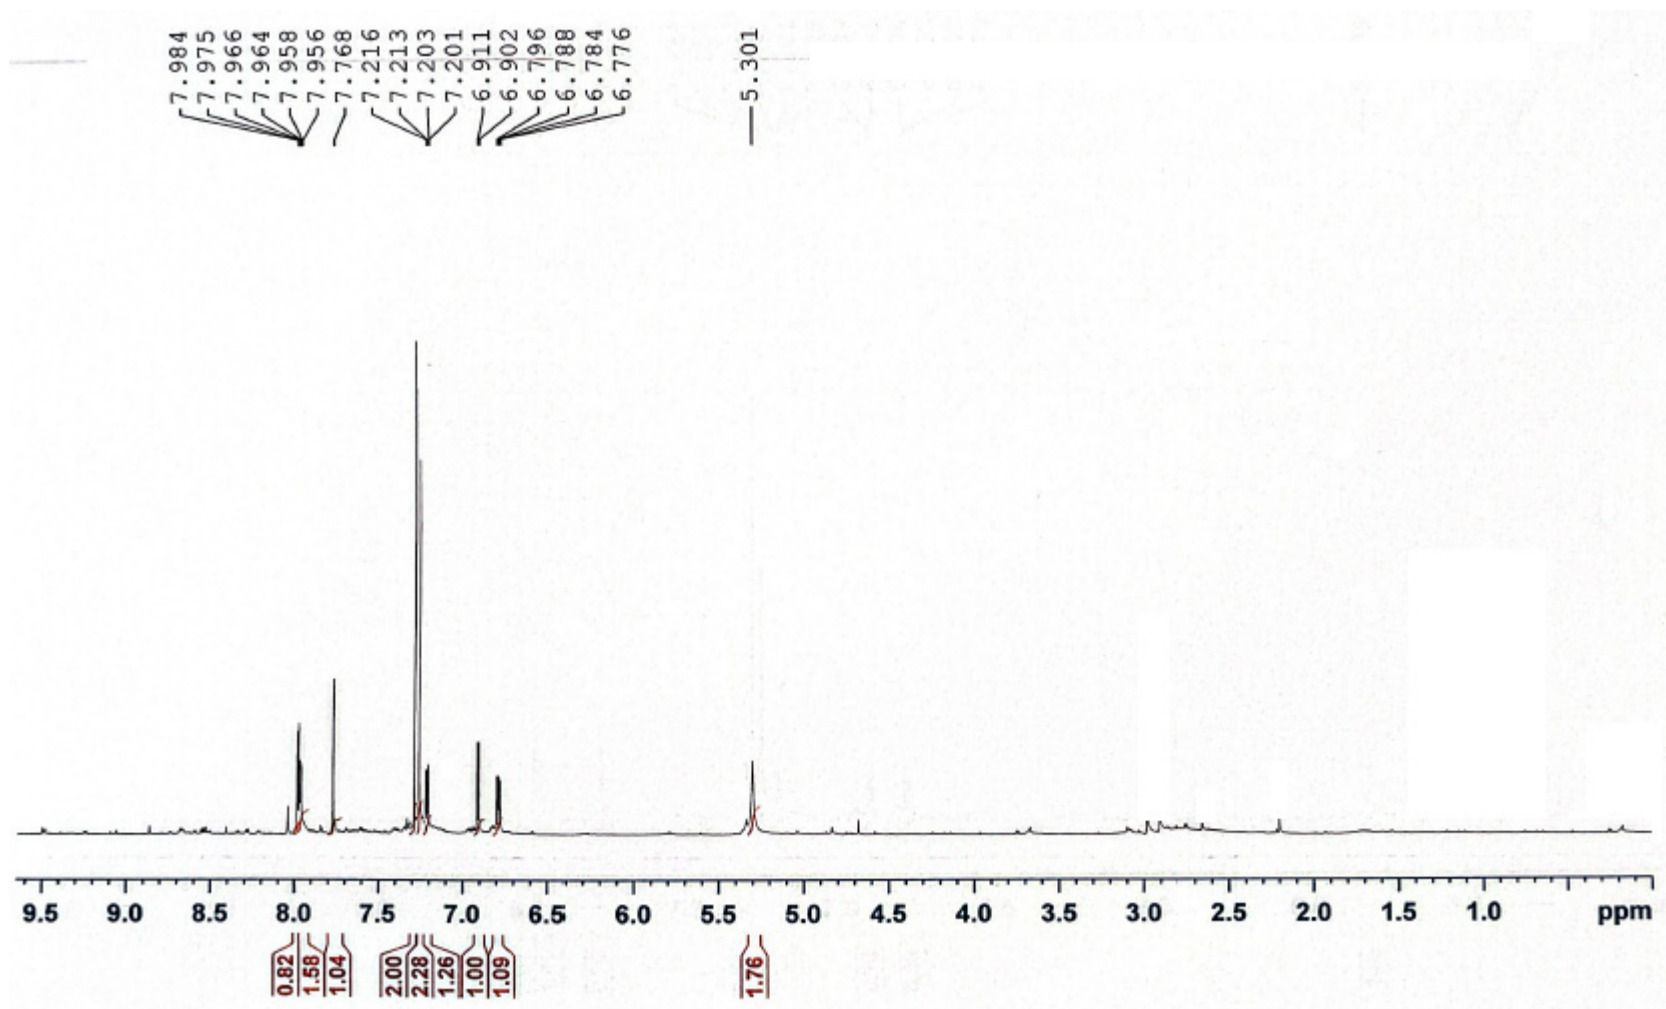

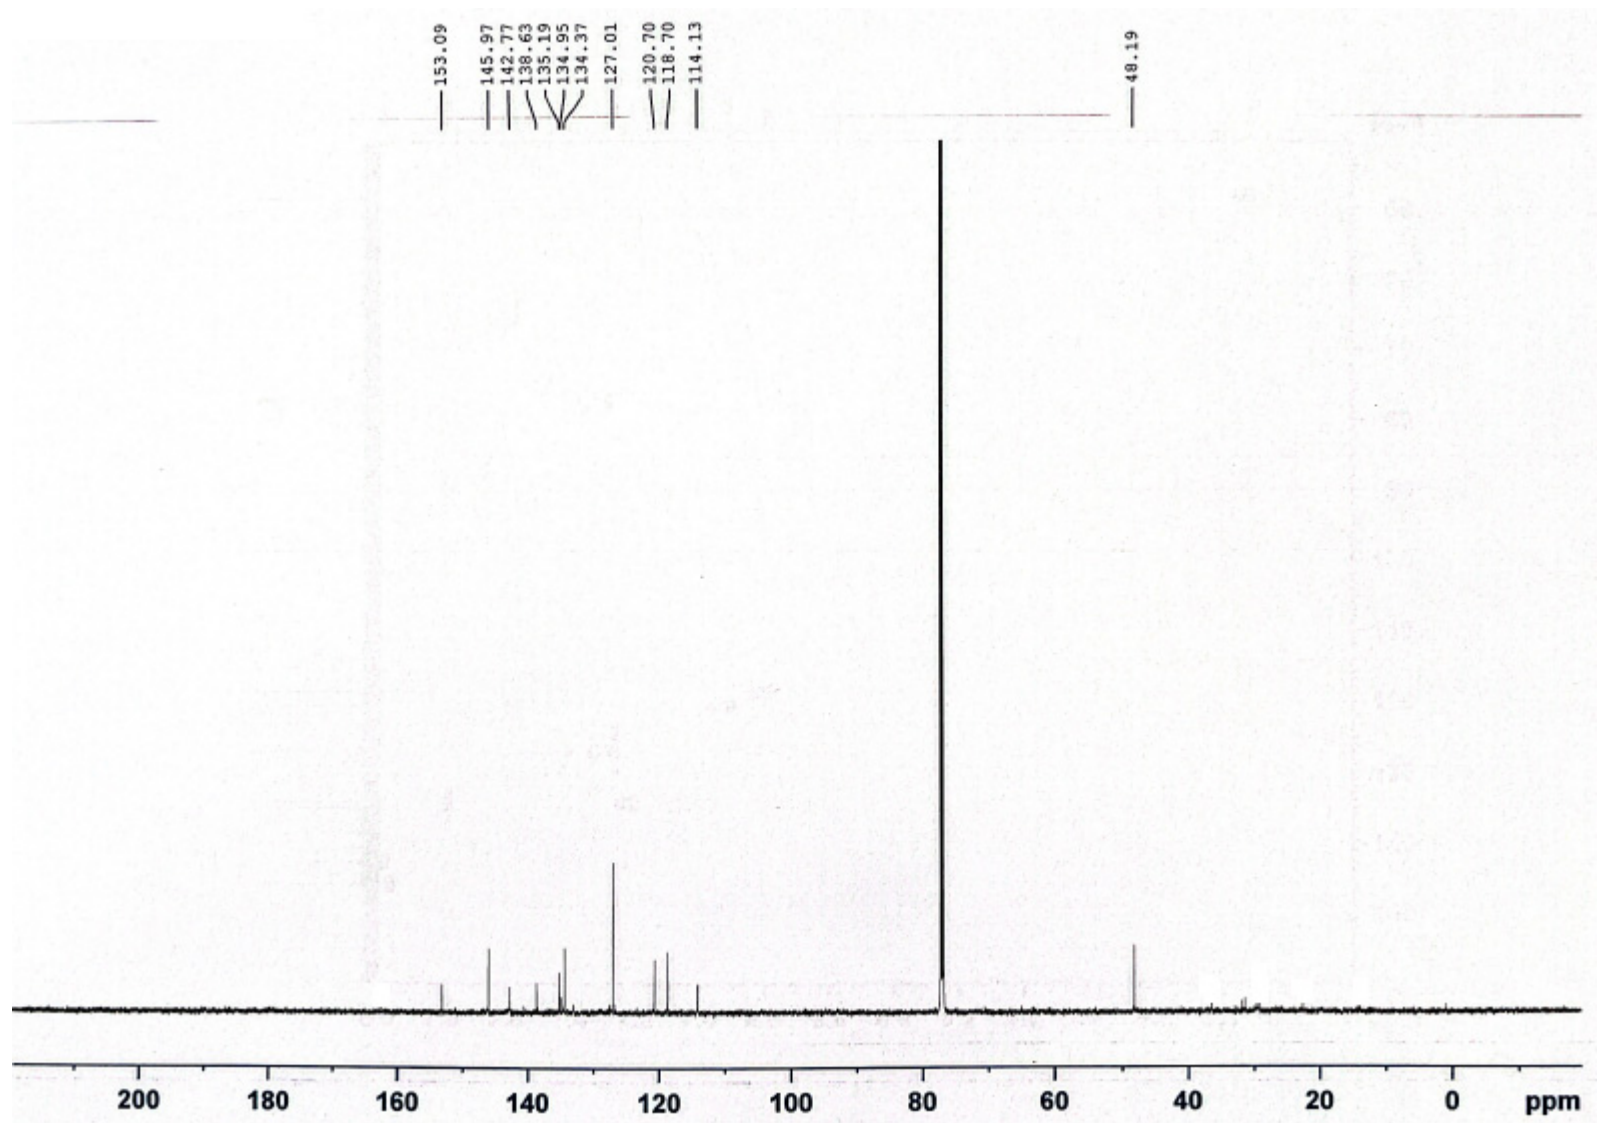

**Acquisition Parameter**

|             |          |                      |          |                  |           |
|-------------|----------|----------------------|----------|------------------|-----------|
| Source Type | ESI      | Ion Polarity         | Positive | Set Nebulizer    | 0.3 Bar   |
| Focus       | Active   | Set Capillary        | 4000 V   | Set Dry Heater   | 200 °C    |
| Scan Begin  | 100 m/z  | Set End Plate Offset | -500 V   | Set Dry Gas      | 3.0 l/min |
| Scan End    | 1000 m/z | Set Charging Voltage | 2000 V   | Set Divert Valve | Source    |
|             |          | Set Corona           | 0 nA     | Set APCI Heater  | 0 °C      |

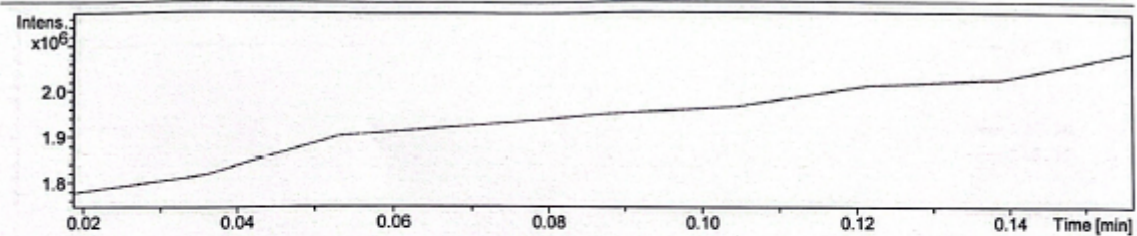**+MS, 0.0-0.1min #2-8**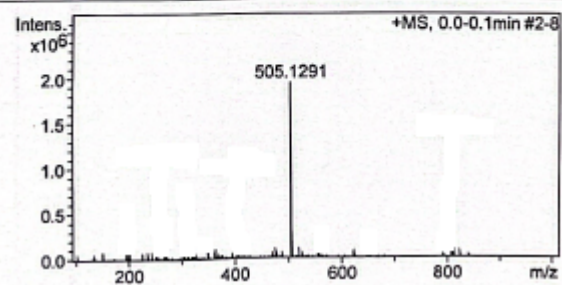

NMR spectra and HR MS of 2,6-bis((dipyrido[3,2-b:3',4'-e][1,4]thiazin-10-yl)methyl)pyridine (**2c**)

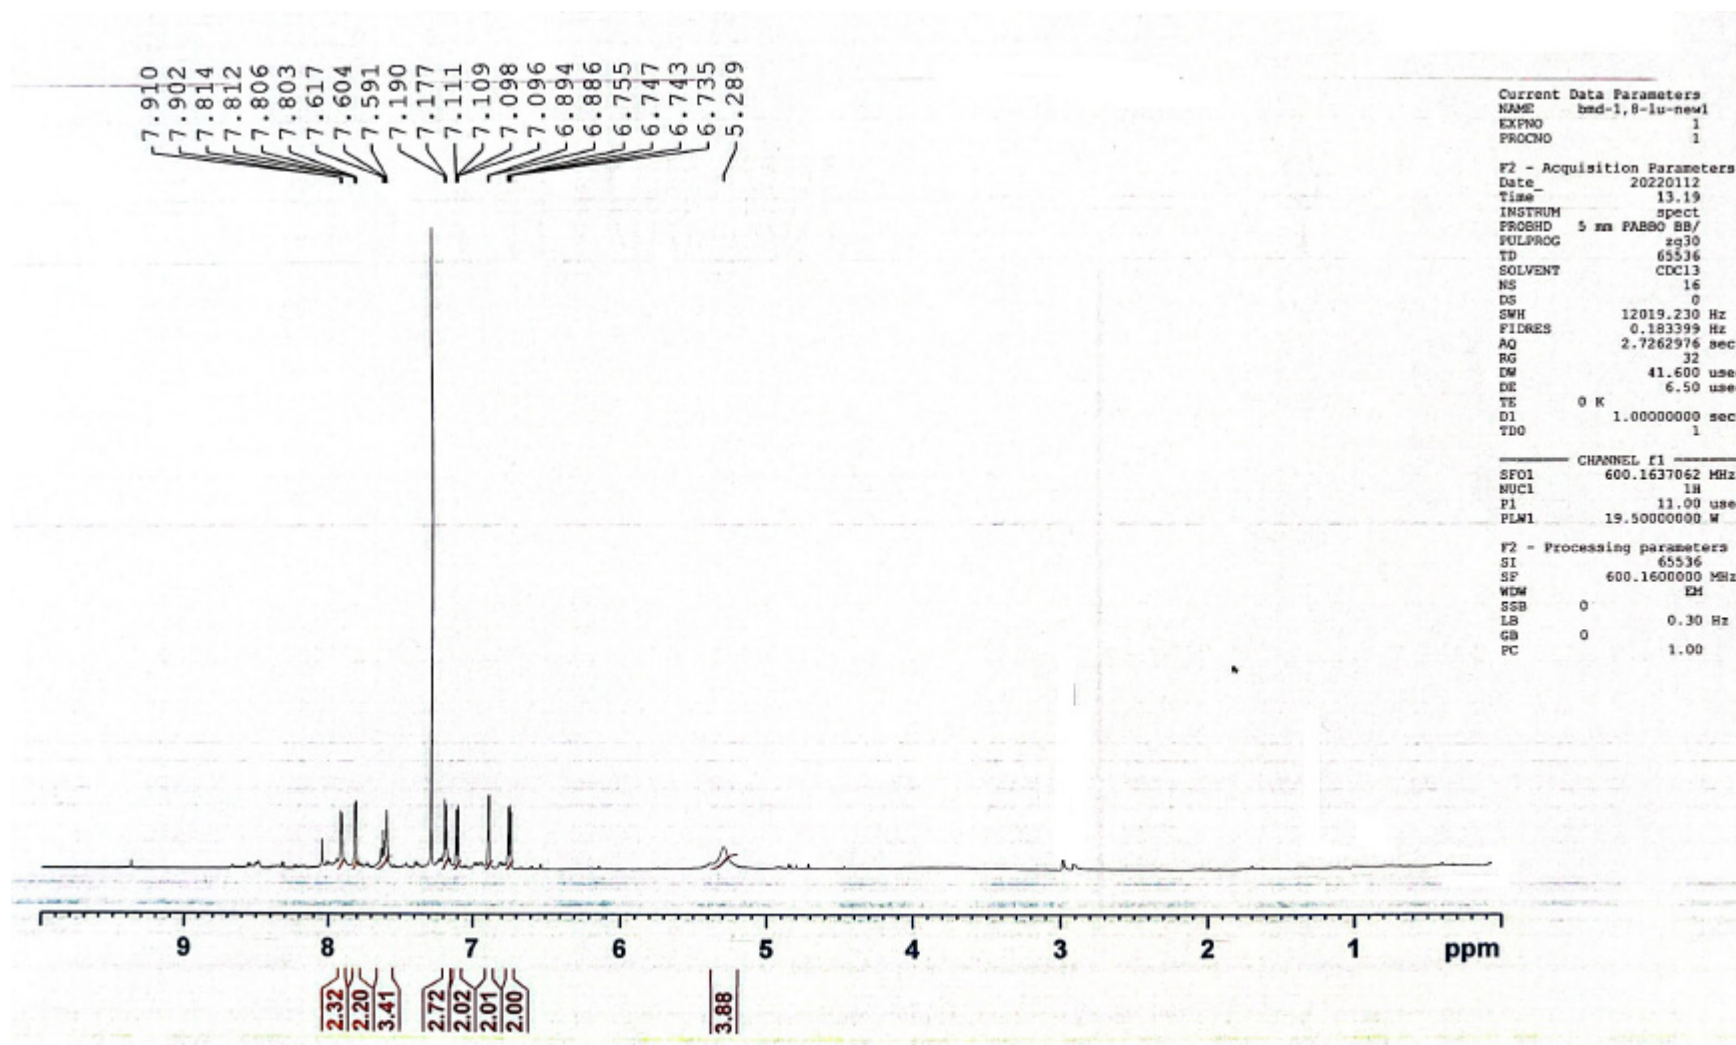

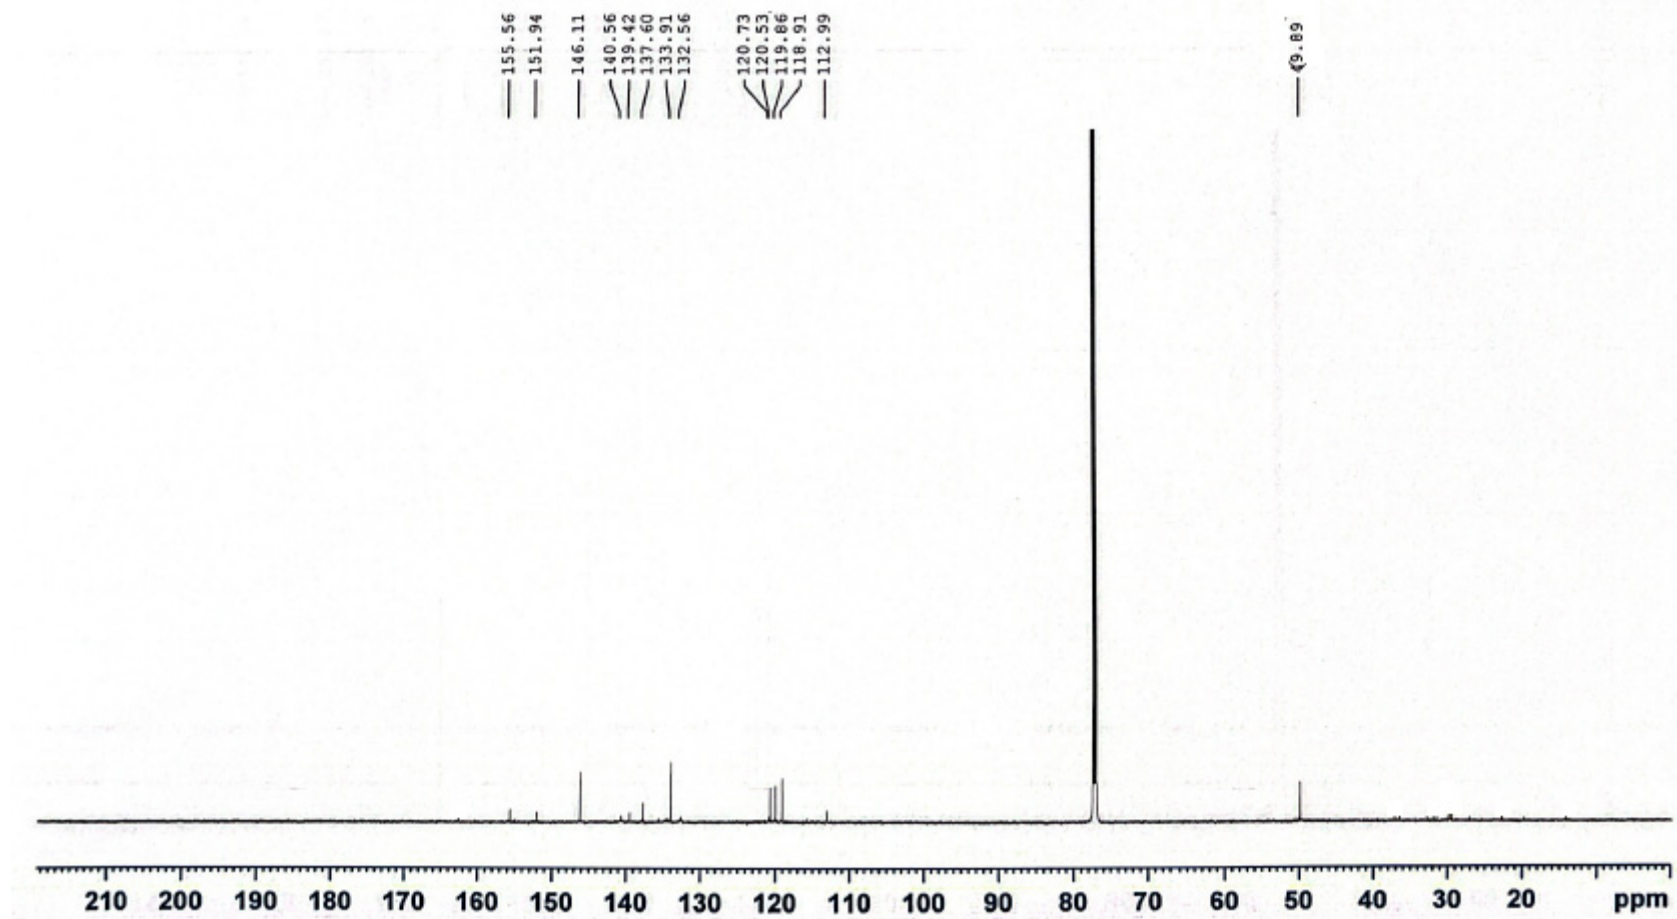



# Acquisition Parameter

|             |          |                      |          |                  |           |
|-------------|----------|----------------------|----------|------------------|-----------|
| Source Type | ESI      | Ion Polarity         | Positive | Set Nebulizer    | 0.3 Bar   |
| Focus       | Active   | Set Capillary        | 4000 V   | Set Dry Heater   | 200 °C    |
| Scan Begin  | 100 m/z  | Set End Plate Offset | -500 V   | Set Dry Gas      | 3.0 l/min |
| Scan End    | 1000 m/z | Set Charging Voltage | 2000 V   | Set Divert Valve | Source    |
|             |          | Set Corona           | 0 nA     | Set APCI Heater  | 0 °C      |

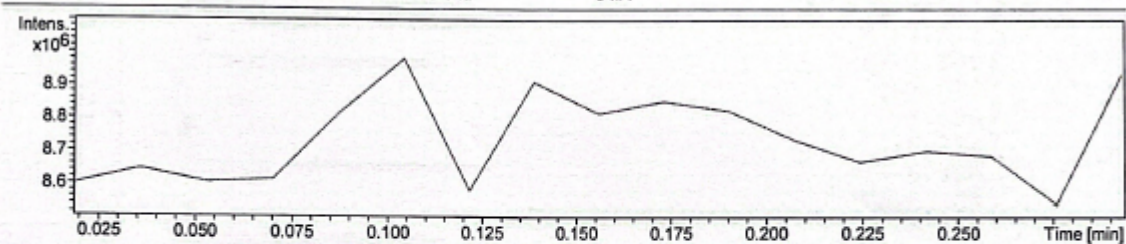

## +MS, 0.0-0.1min #2-3

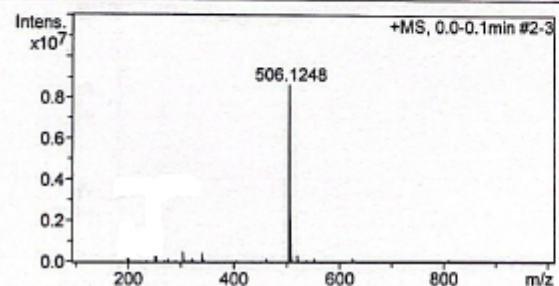



NMR spectra and HR MS of 1,2-bis((dipyrido[3,4-b:3',4'-e][1,4]thiazin-10-yl)methyl)benzene (**3a**)

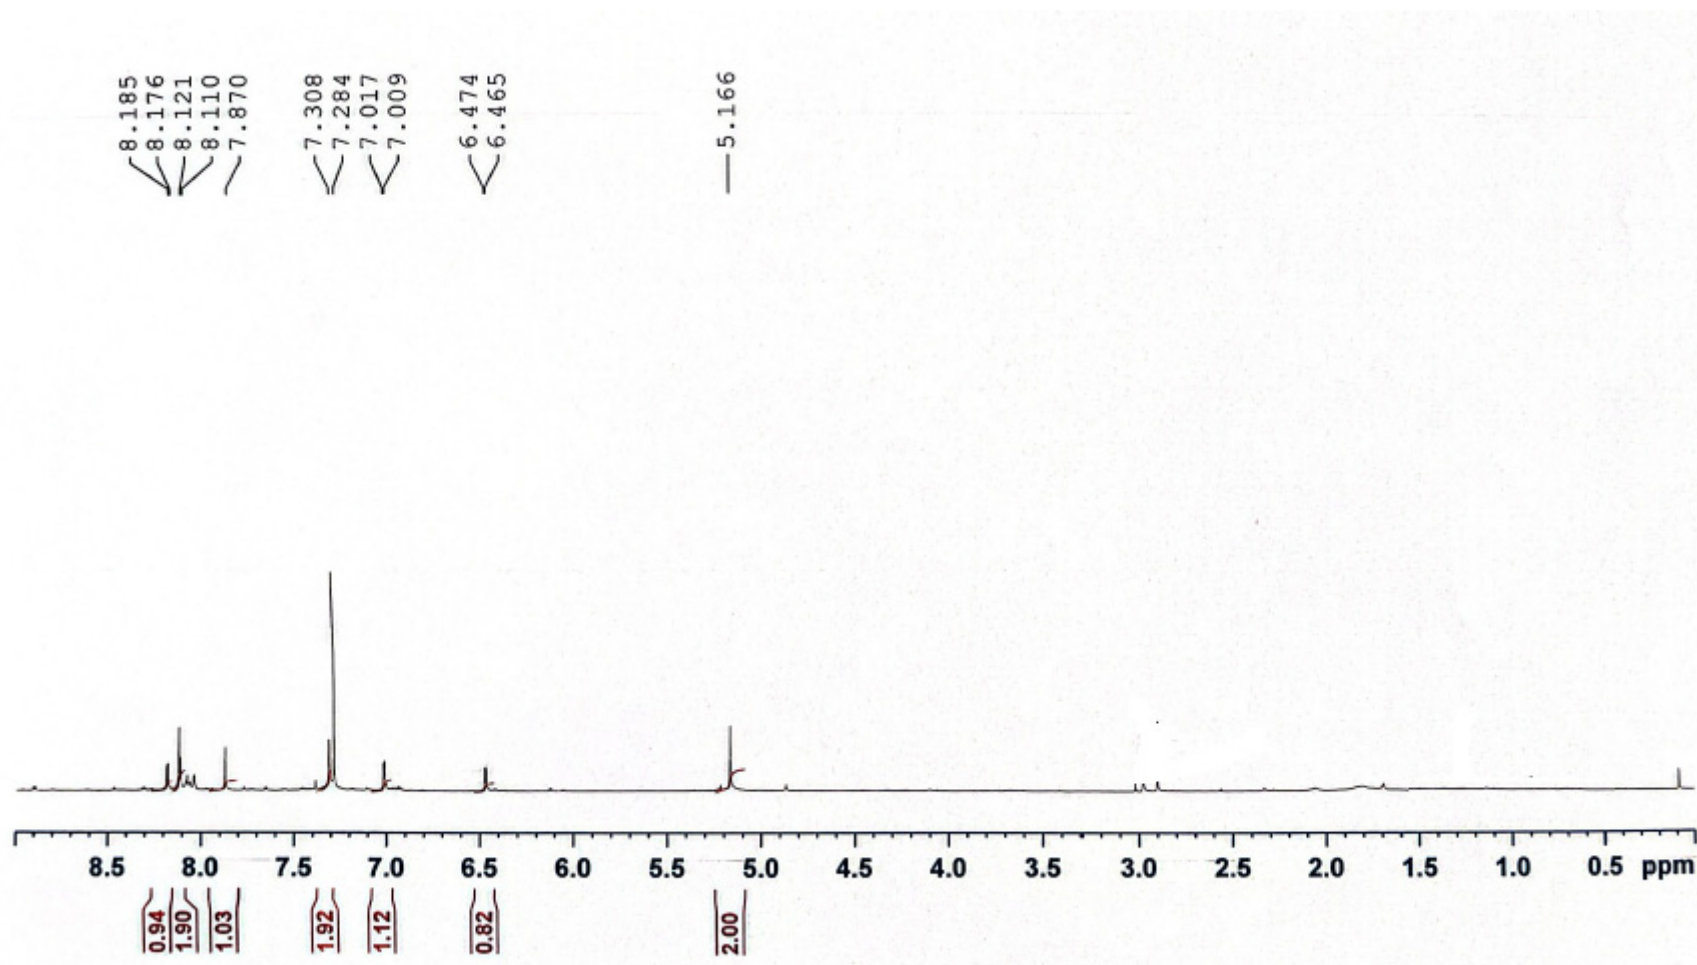

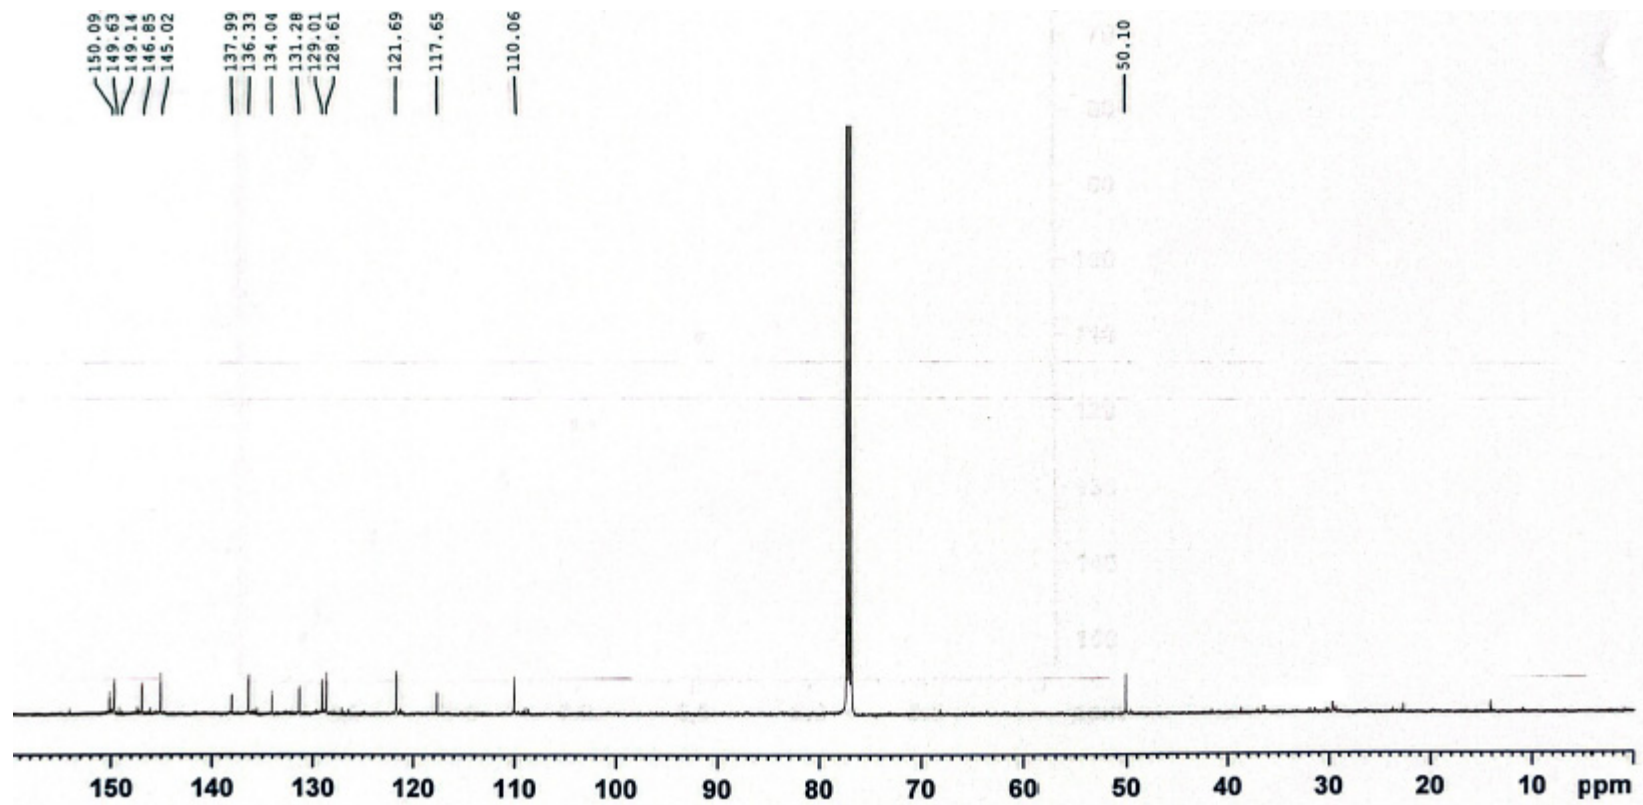

**Acquisition Parameter**

|             |          |                      |          |                  |           |
|-------------|----------|----------------------|----------|------------------|-----------|
| Source Type | ESI      | Ion Polarity         | Positive | Set Nebulizer    | 0.3 Bar   |
| Focus       | Active   | Set Capillary        | 4000 V   | Set Dry Heater   | 200 °C    |
| Scan Begin  | 100 m/z  | Set End Plate Offset | -500 V   | Set Dry Gas      | 3.0 l/min |
| Scan End    | 1000 m/z | Set Charging Voltage | 2000 V   | Set Divert Valve | Source    |
|             |          | Set Corona           | 0 nA     | Set APCI Heater  | 0 °C      |

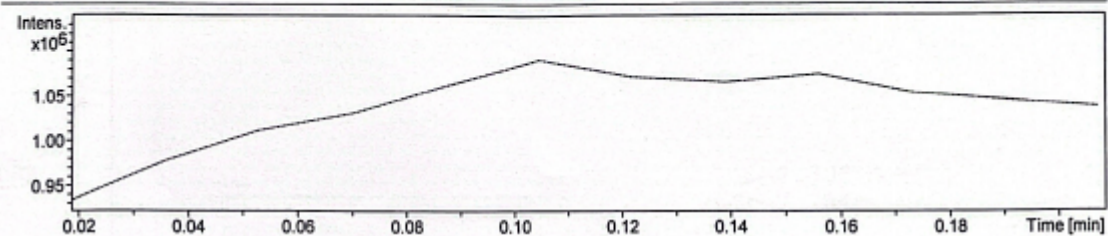**+MS, 0.0-0.1min #2-8**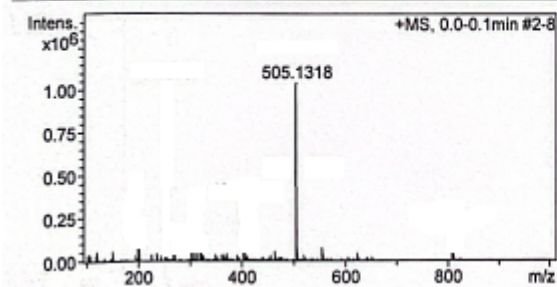

NMR spectra and HR MS of 1,4-bis((dipyrido[2,3-b:2',3'-e][1,4]thiazin-10-yl)methyl)benzene (**3b**)

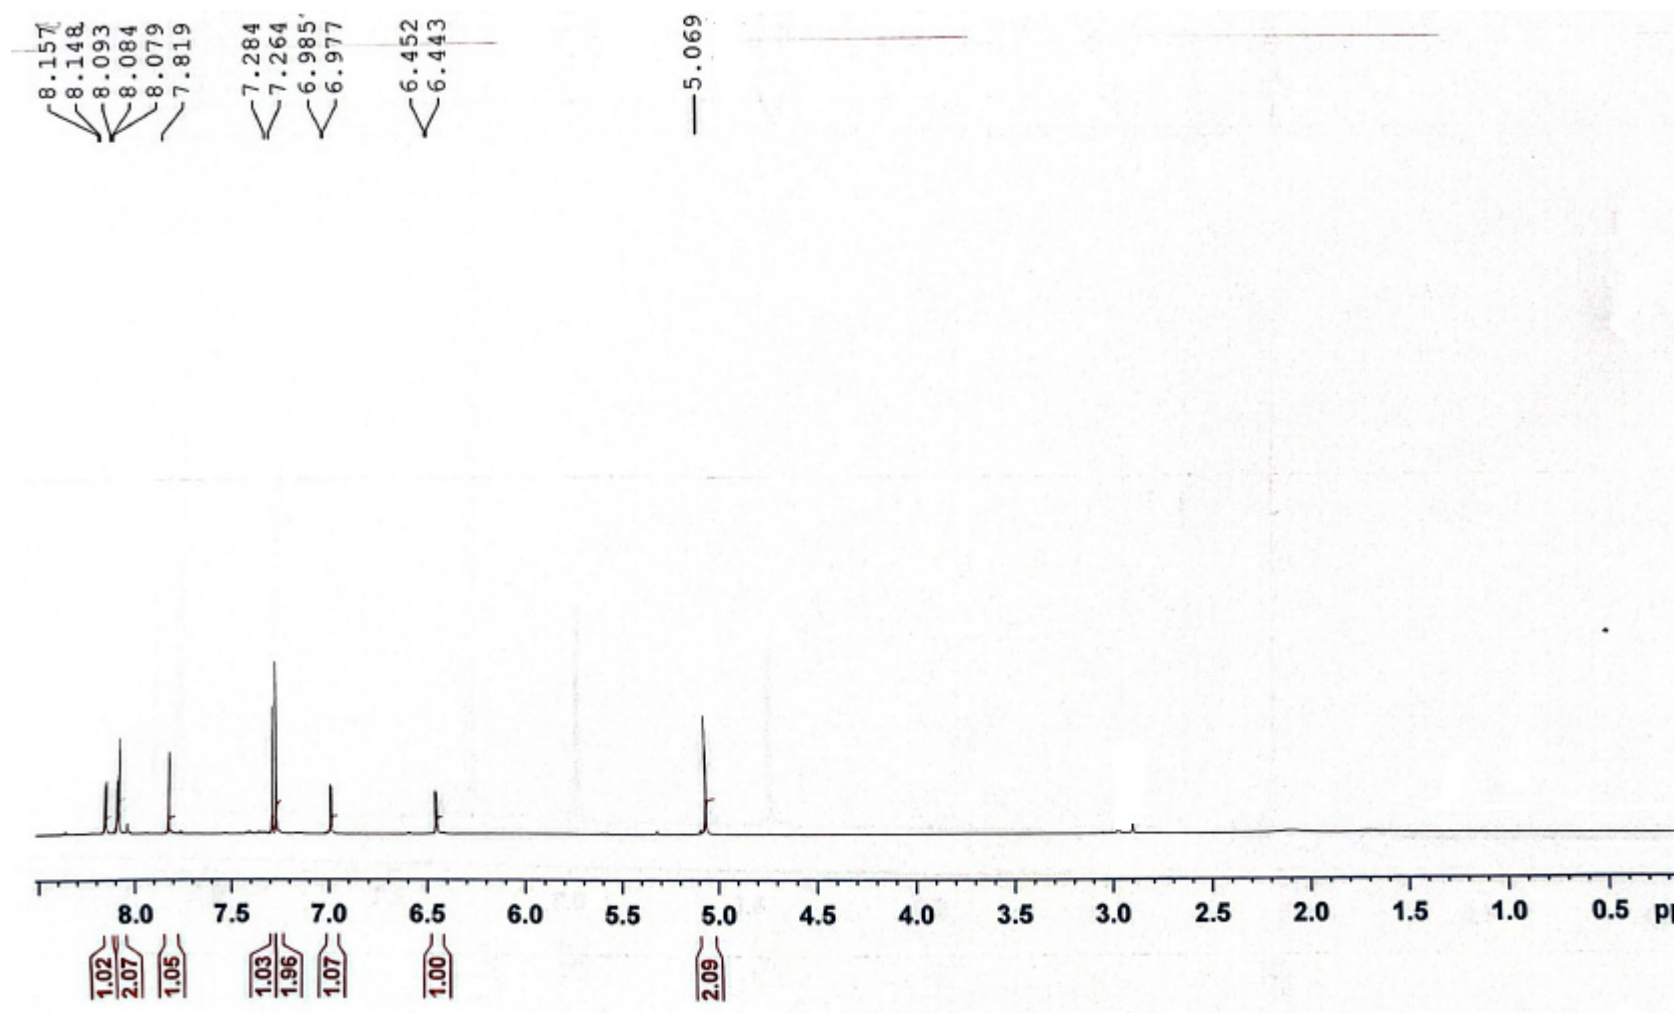

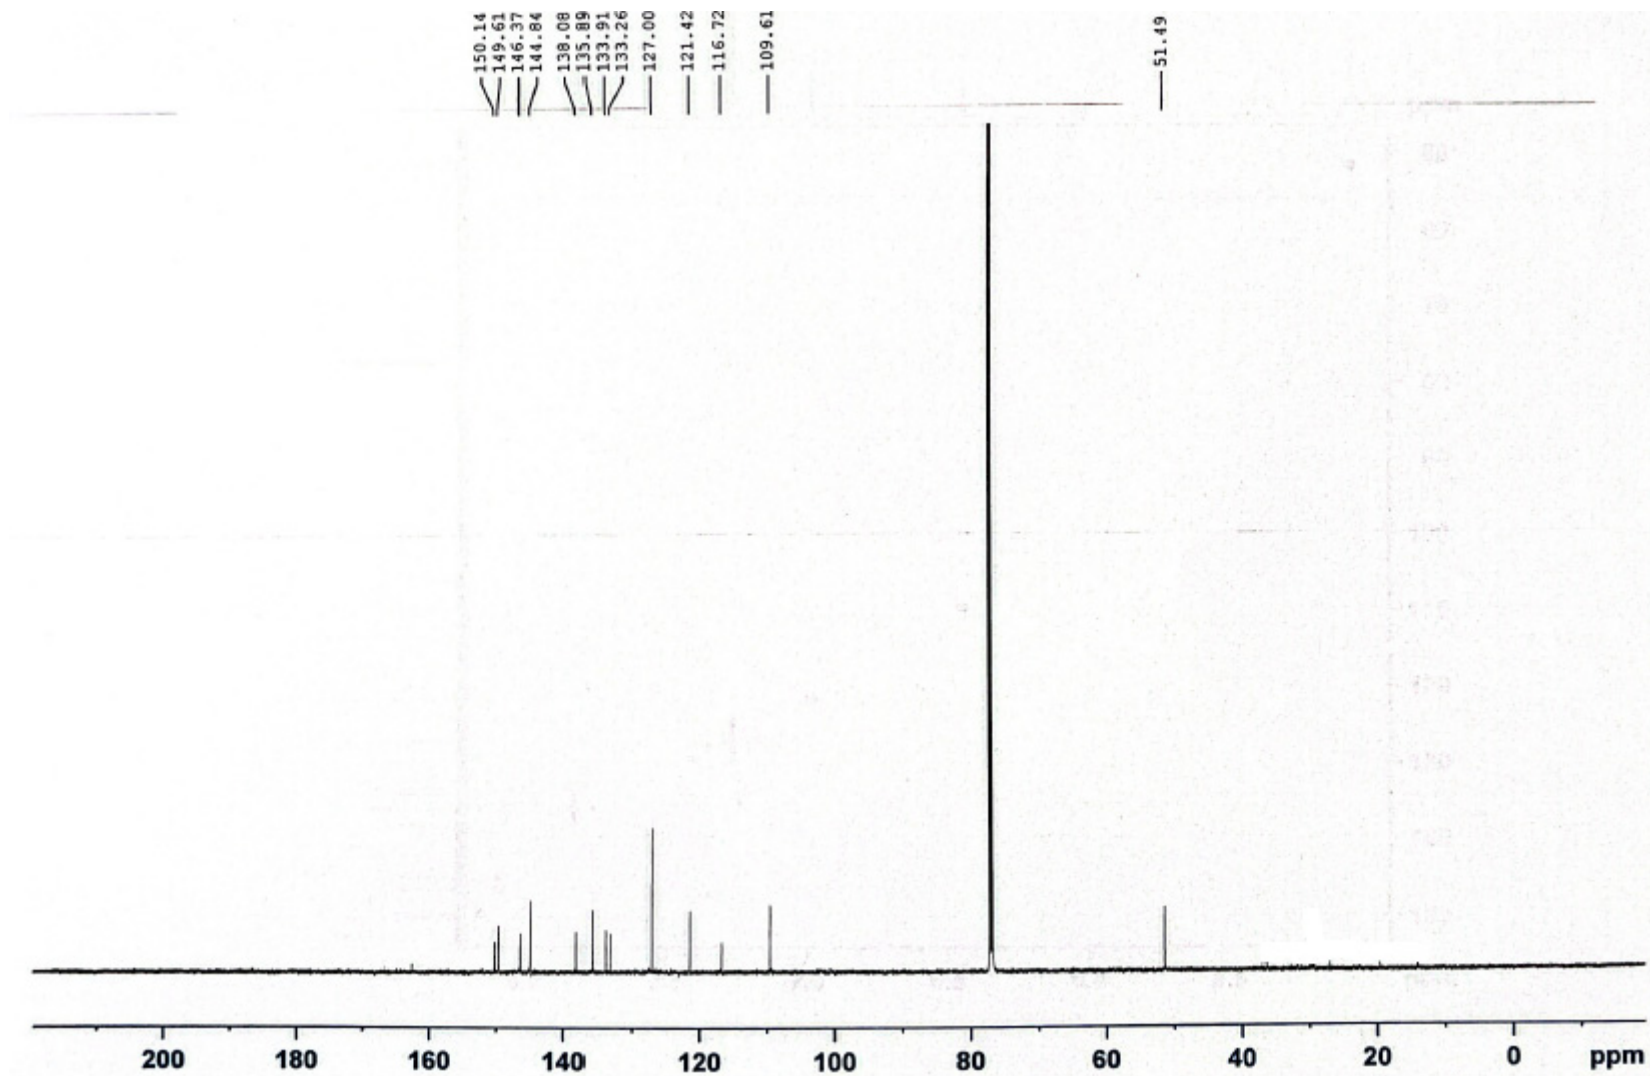

# Acquisition Parameter

|             |          |                      |          |                  |           |
|-------------|----------|----------------------|----------|------------------|-----------|
| Source Type | ESI      | Ion Polarity         | Positive | Set Nebulizer    | 0.3 Bar   |
| Focus       | Active   | Set Capillary        | 4000 V   | Set Dry Heater   | 200 °C    |
| Scan Begin  | 100 m/z  | Set End Plate Offset | -500 V   | Set Dry Gas      | 3.0 l/min |
| Scan End    | 1000 m/z | Set Charging Voltage | 2000 V   | Set Divert Valve | Source    |
|             |          | Set Corona           | 0 nA     | Set APCI Heater  | 0 °C      |

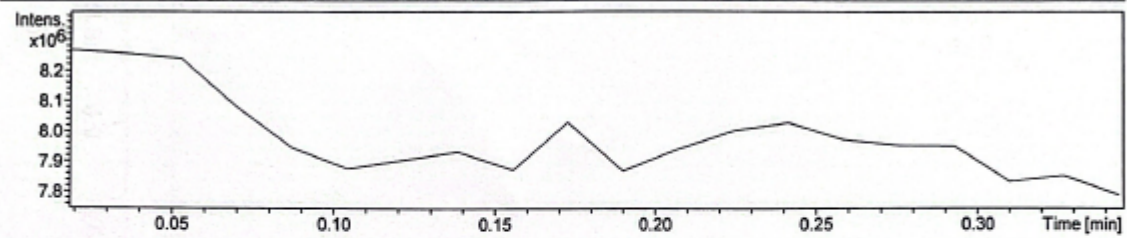

## +MS, 0.0-0.3min #2-19

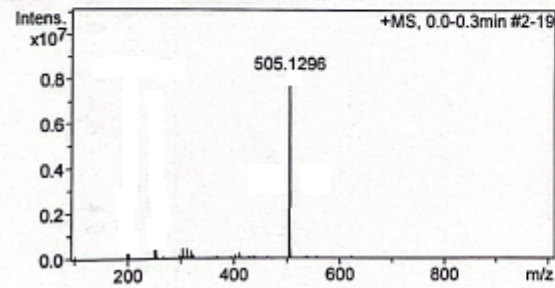



NMR spectra and HR MS of 2,6-bis((dipyrido[3,4-b:3',4'-e][1,4]thiazin-10-yl)methyl)pyridine (**3c**)

.  $^1\text{H}$  NMR of 2,6-bis((dipyrido[3,4-b:3',4'-e][1,4]thiazin-10-yl)methyl)pyridine (**3c**)

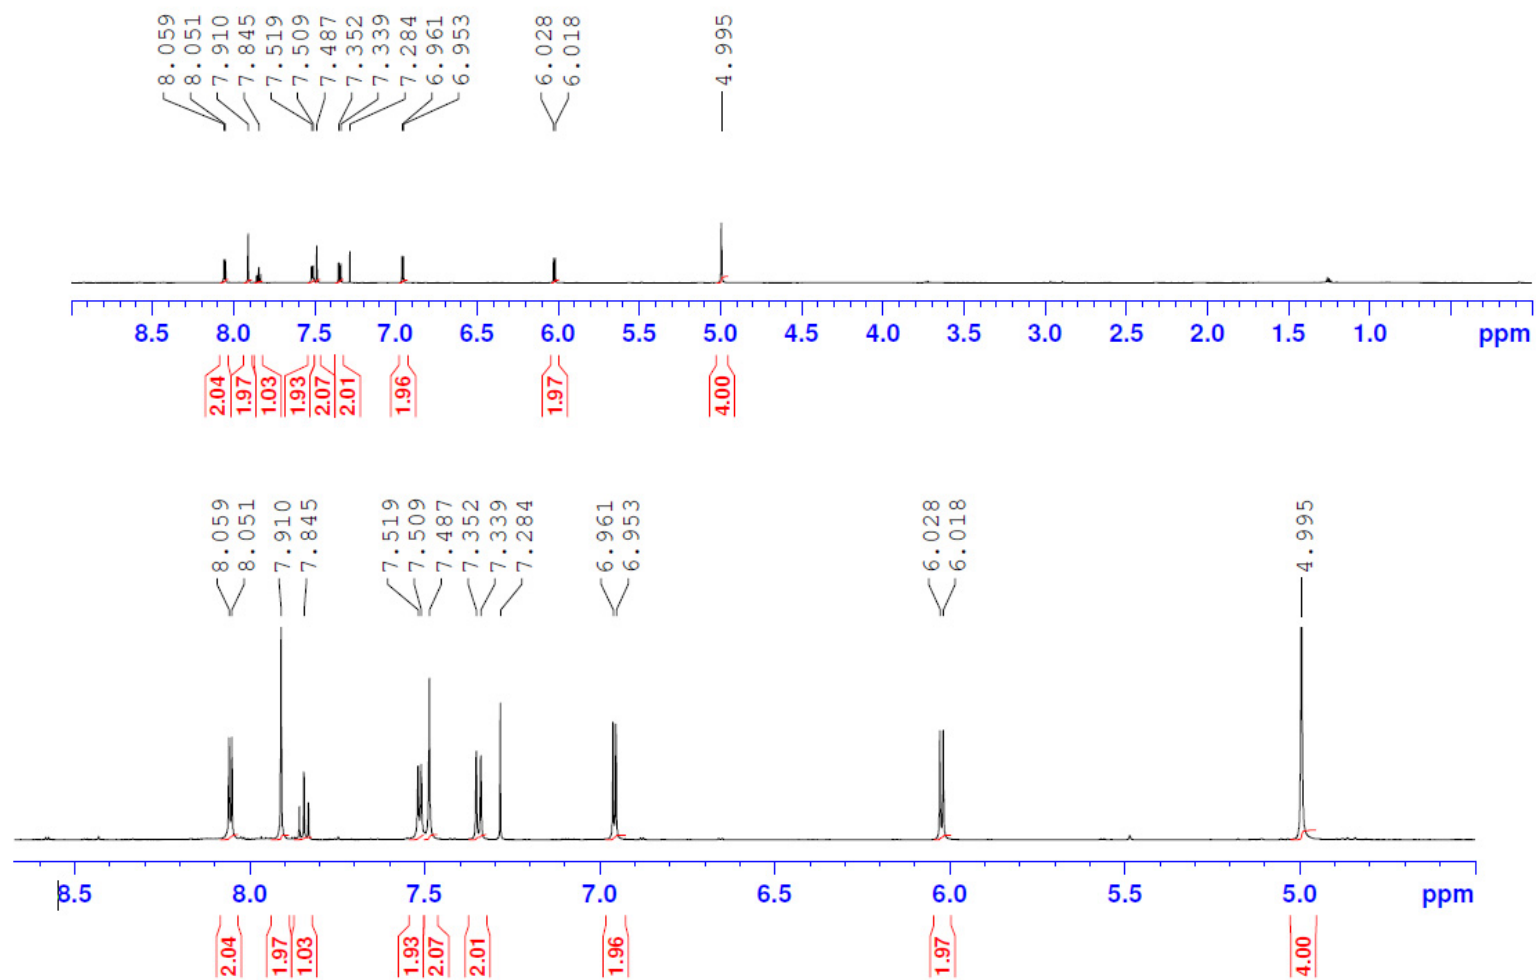

COSY NMR of 2,6-bis((dipyrido[3,4-b:3',4'-e][1,4]thiazin-10-yl)methyl)pyridine (**3c**)

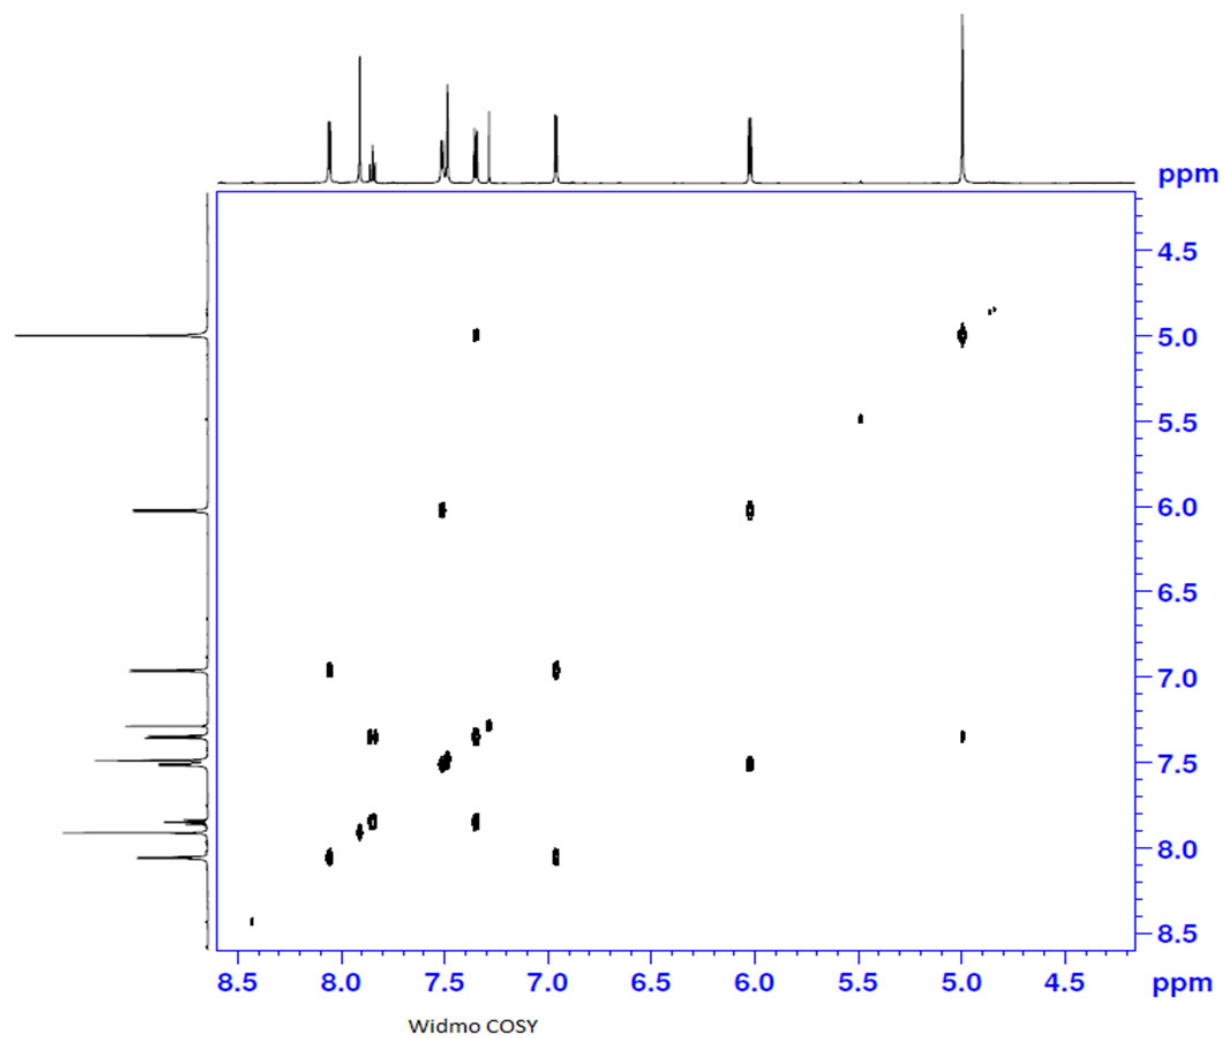

NOESY NMR of 2,6-bis((dipyrido[3,4-b:3',4'-e][1,4]thiazin-10-yl)methyl)pyridine (**3c**)

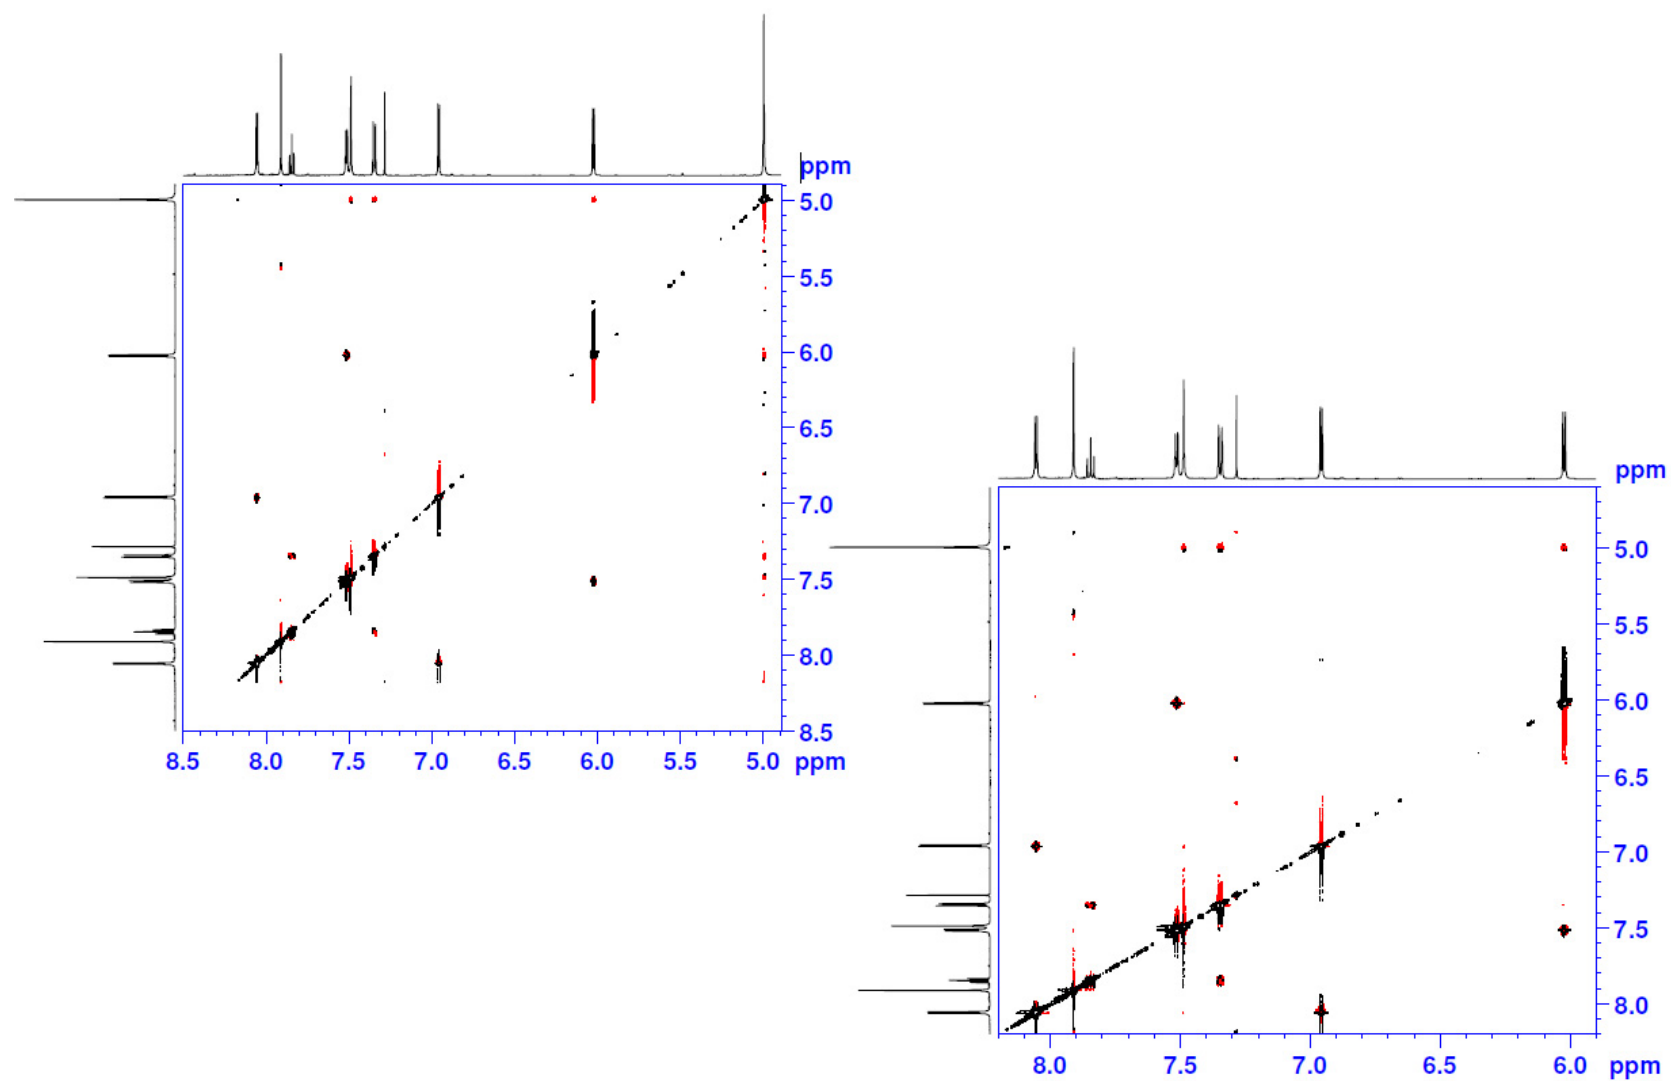

<sup>13</sup>C NMR of 2,6-bis((dipyrido[3,4-b:3',4'-e][1,4]thiazin-10-yl)methyl)pyridine (**3c**)

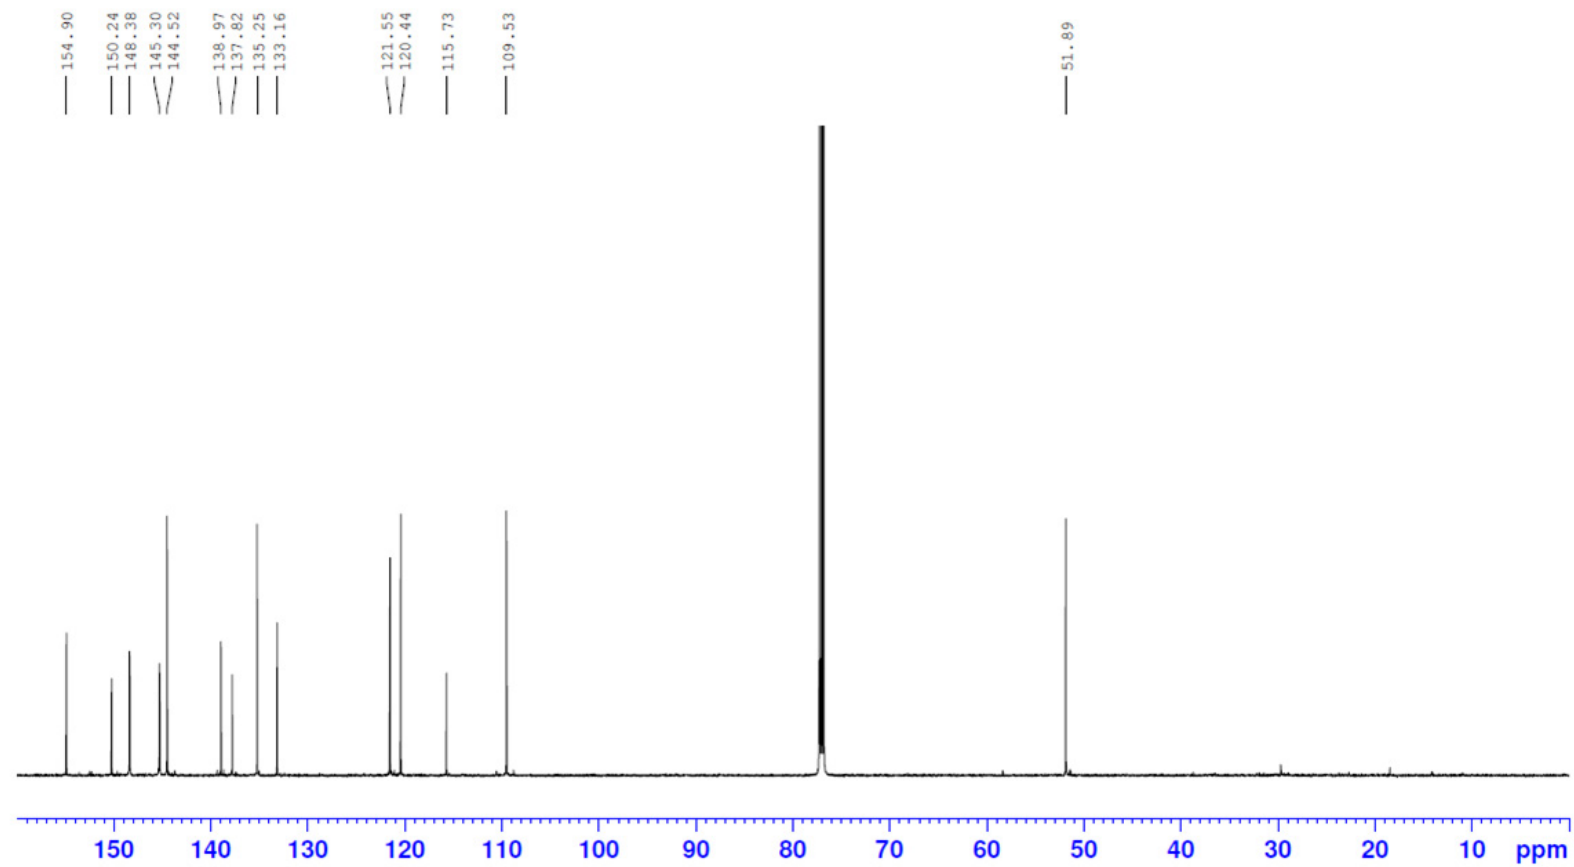

$^{13}\text{C}$  NMR of 2,6-bis((dipyrido[3,4-b:3',4'-e][1,4]thiazin-10-yl)methyl)pyridine (**3c**) – aromatic part

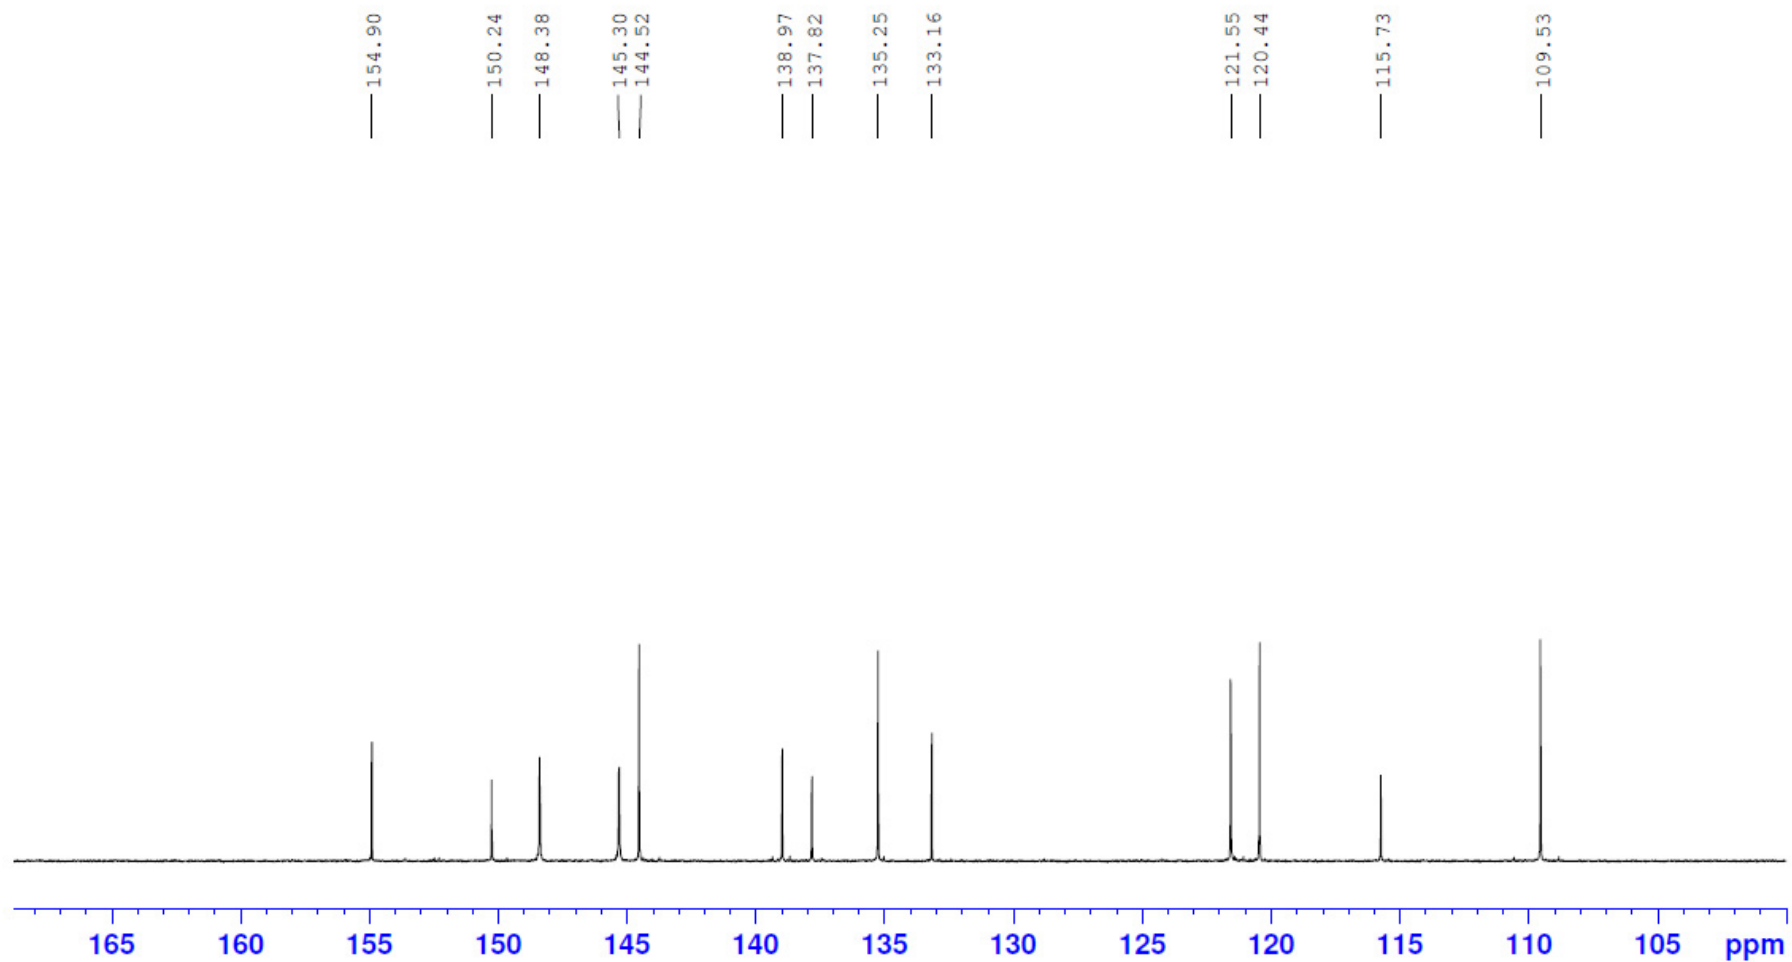

HSQC NMR of 2,6-bis((dipyrido[3,4-b:3',4'-e][1,4]thiazin-10-yl)methyl)pyridine (**3c**)

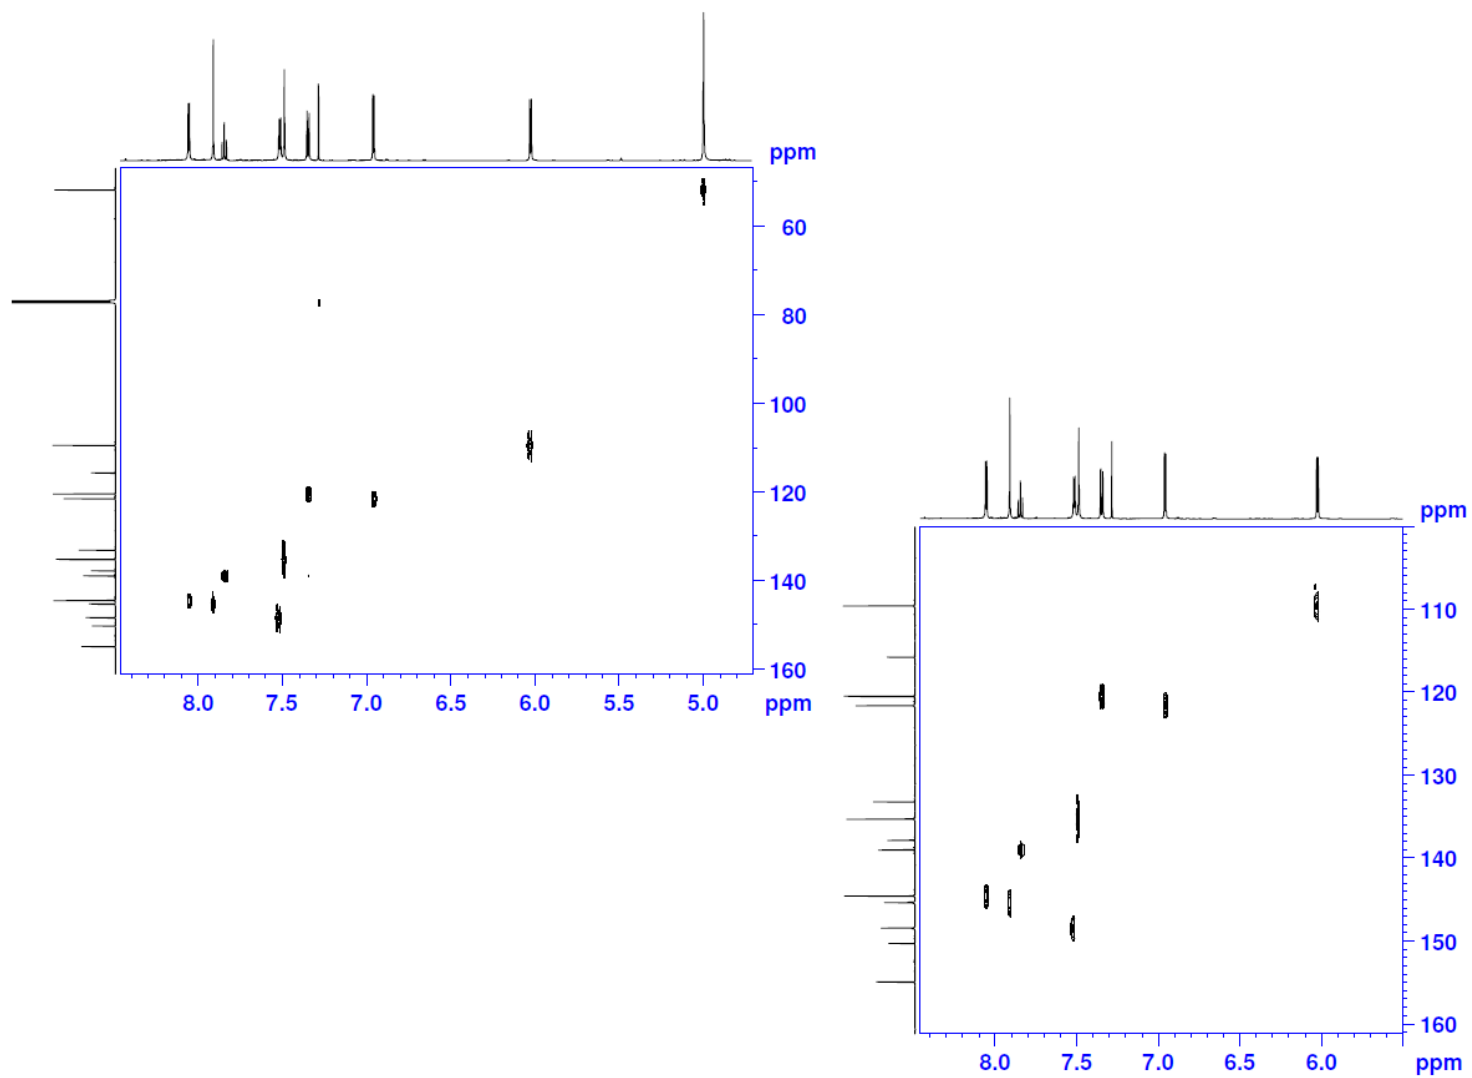

HMBC NMR of 2,6-bis((dipyrido[3,4-b:3',4'-e][1,4]thiazin-10-yl)methyl)pyridine (**3c**)



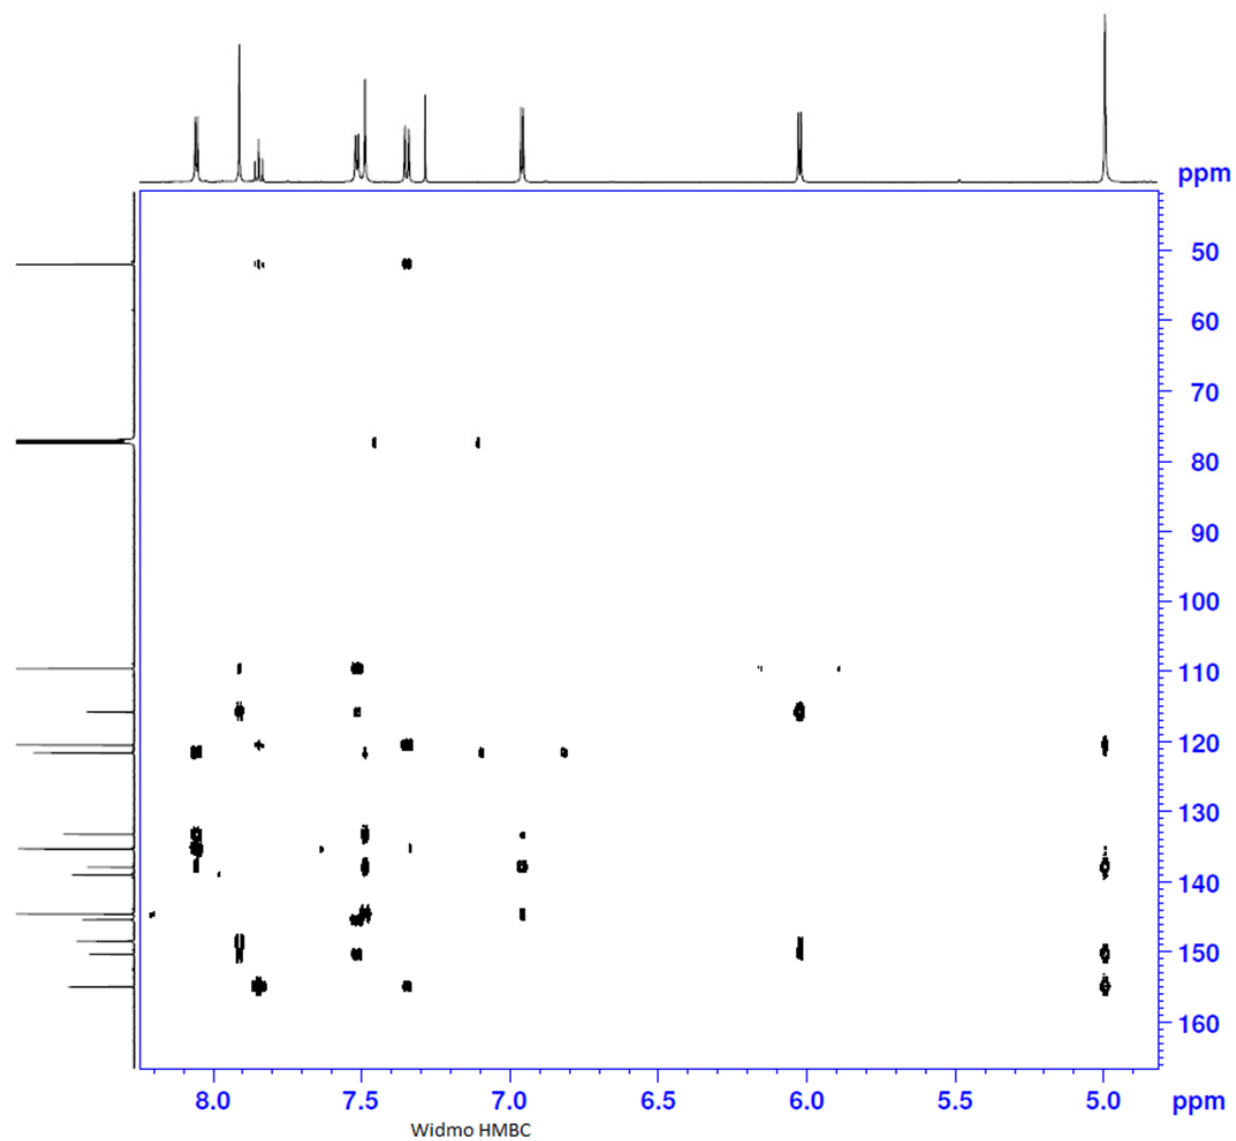

HR MS of 2,6-bis((dipyrido[3,4-b:3',4'-e][1,4]thiazin-10-yl)methyl)pyridine (**3c**)

**Acquisition Parameter**

|             |          |                      |          |                  |           |
|-------------|----------|----------------------|----------|------------------|-----------|
| Source Type | ESI      | Ion Polarity         | Positive | Set Nebulizer    | 0.3 Bar   |
| Focus       | Active   | Set Capillary        | 4000 V   | Set Dry Heater   | 200 °C    |
| Scan Begin  | 100 m/z  | Set End Plate Offset | -500 V   | Set Dry Gas      | 3.0 l/min |
| Scan End    | 1000 m/z | Set Charging Voltage | 2000 V   | Set Divert Valve | Source    |
|             |          | Set Corona           | 0 nA     | Set APCI Heater  | 0 °C      |

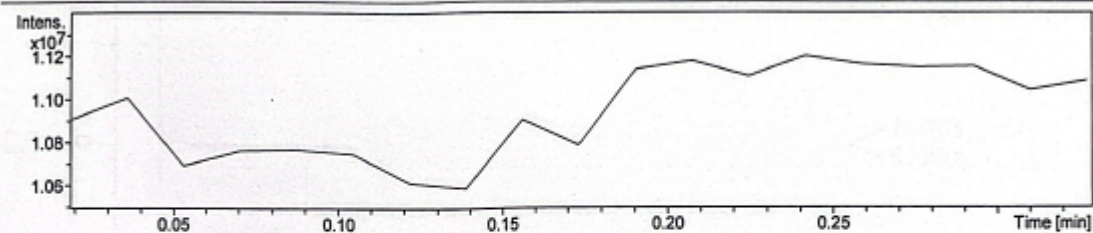**+MS, 0.0-0.3min #2-18**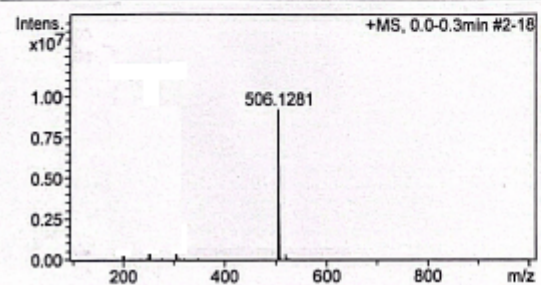

NMR spectra and HR MS of 1,2-bis((dipyrido[2,3-b:4',3'-e][1,4]thiazin-5-yl)methyl)benzene (**4a**)

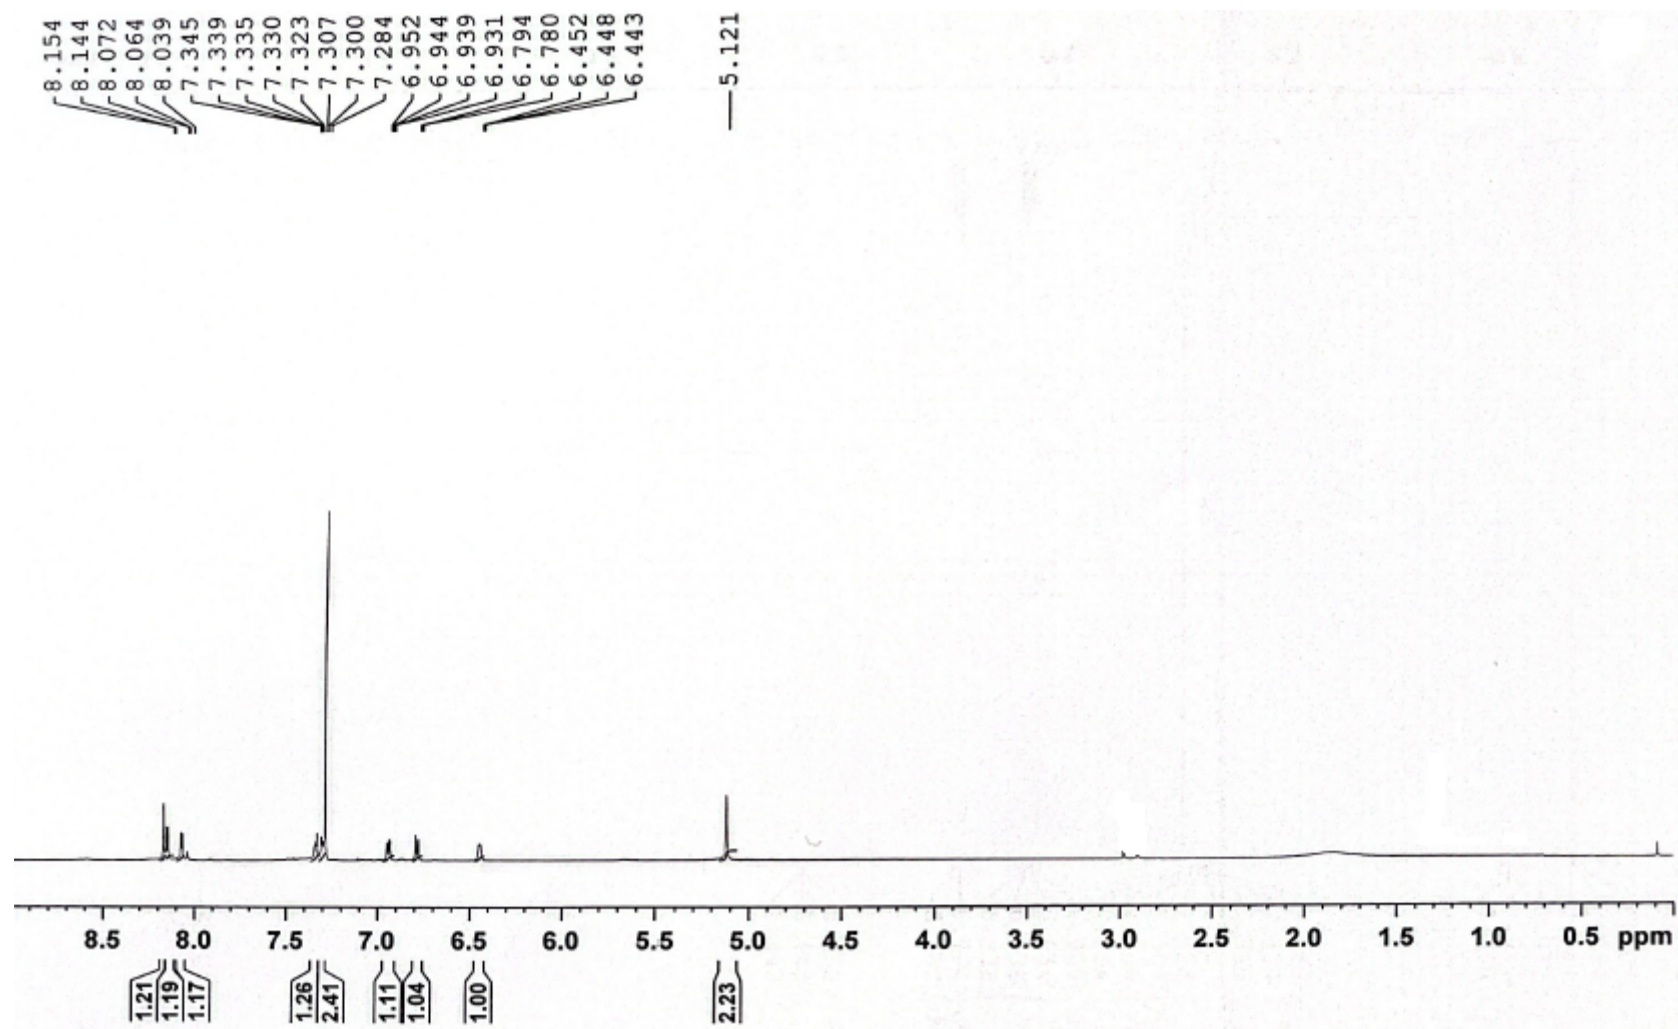

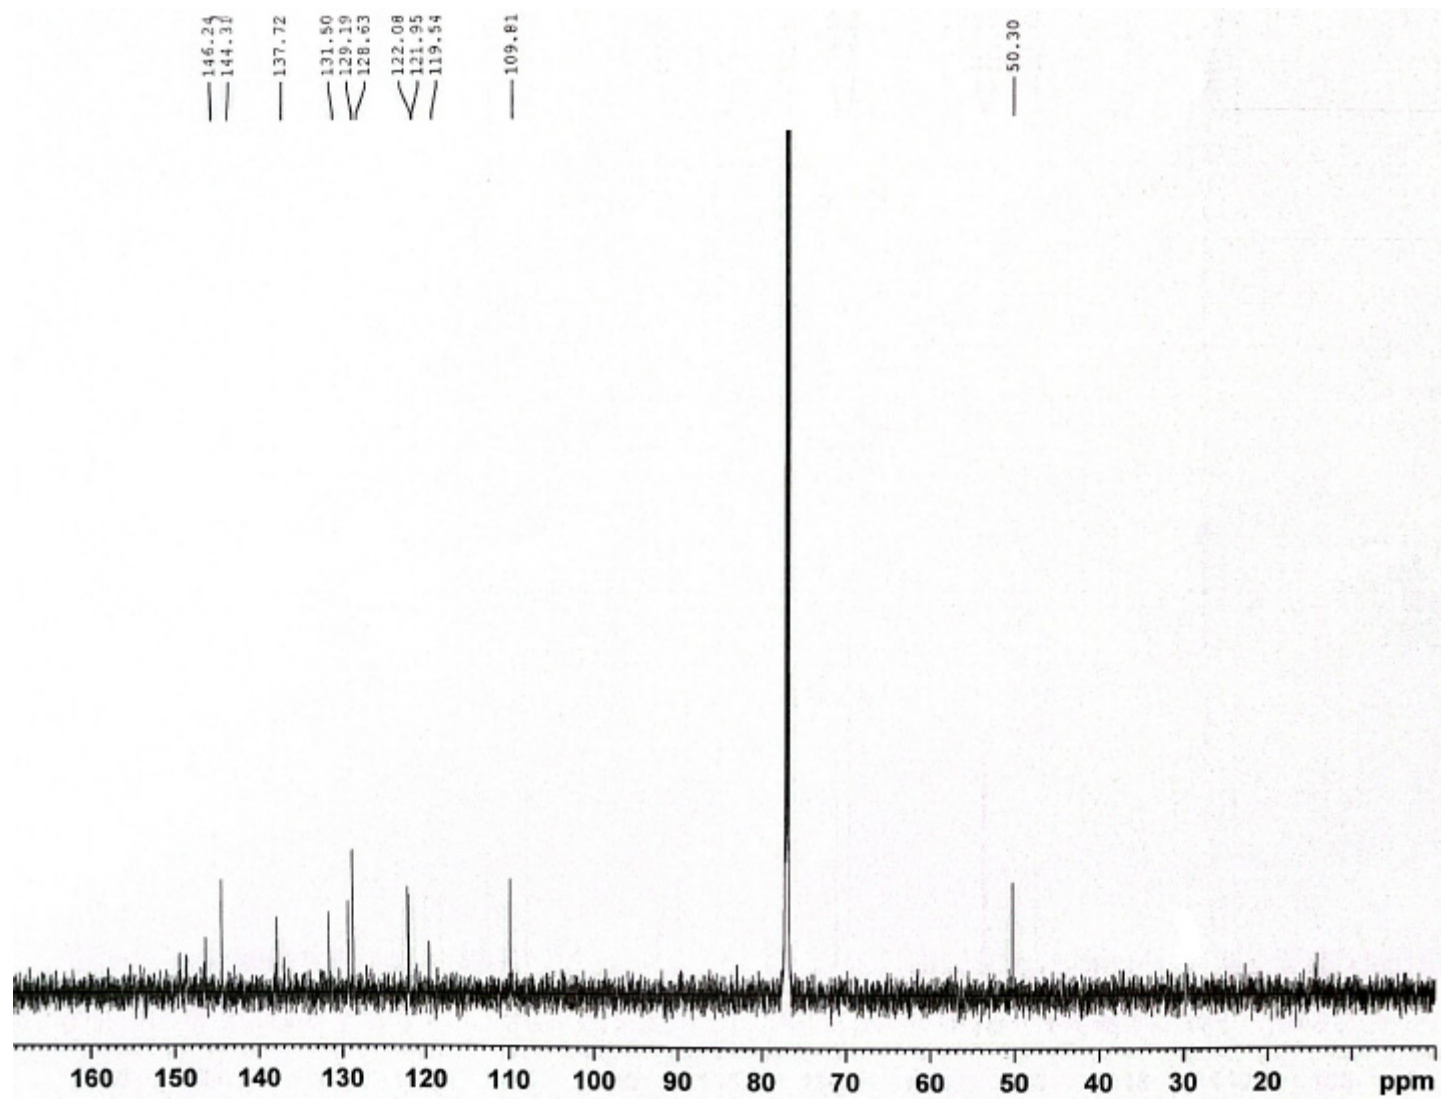

**Acquisition Parameter**

|             |          |                      |          |                  |           |
|-------------|----------|----------------------|----------|------------------|-----------|
| Source Type | ESI      | Ion Polarity         | Positive | Set Nebulizer    | 0.3 Bar   |
| Focus       | Active   | Set Capillary        | 3900 V   | Set Dry Heater   | 200 °C    |
| Scan Begin  | 50 m/z   | Set End Plate Offset | -500 V   | Set Dry Gas      | 4.0 l/min |
| Scan End    | 1000 m/z | Set Charging Voltage | 2000 V   | Set Divert Valve | Source    |
|             |          | Set Corona           | 0 nA     | Set APCI Heater  | 0 °C      |

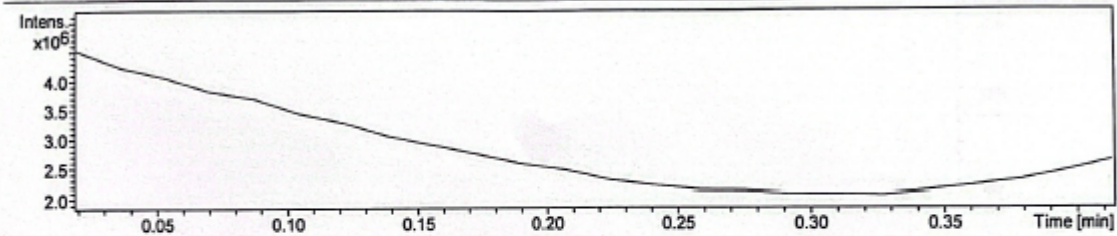**+MS, 0.1-0.4min #4-23**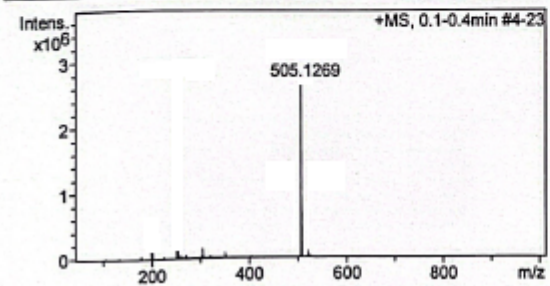

NMR spectra and HR MS of 1,4-bis((dipyrido[2,3-b:2',3'-e][1,4]thiazin-10-yl)methyl)benzene (**4b**)

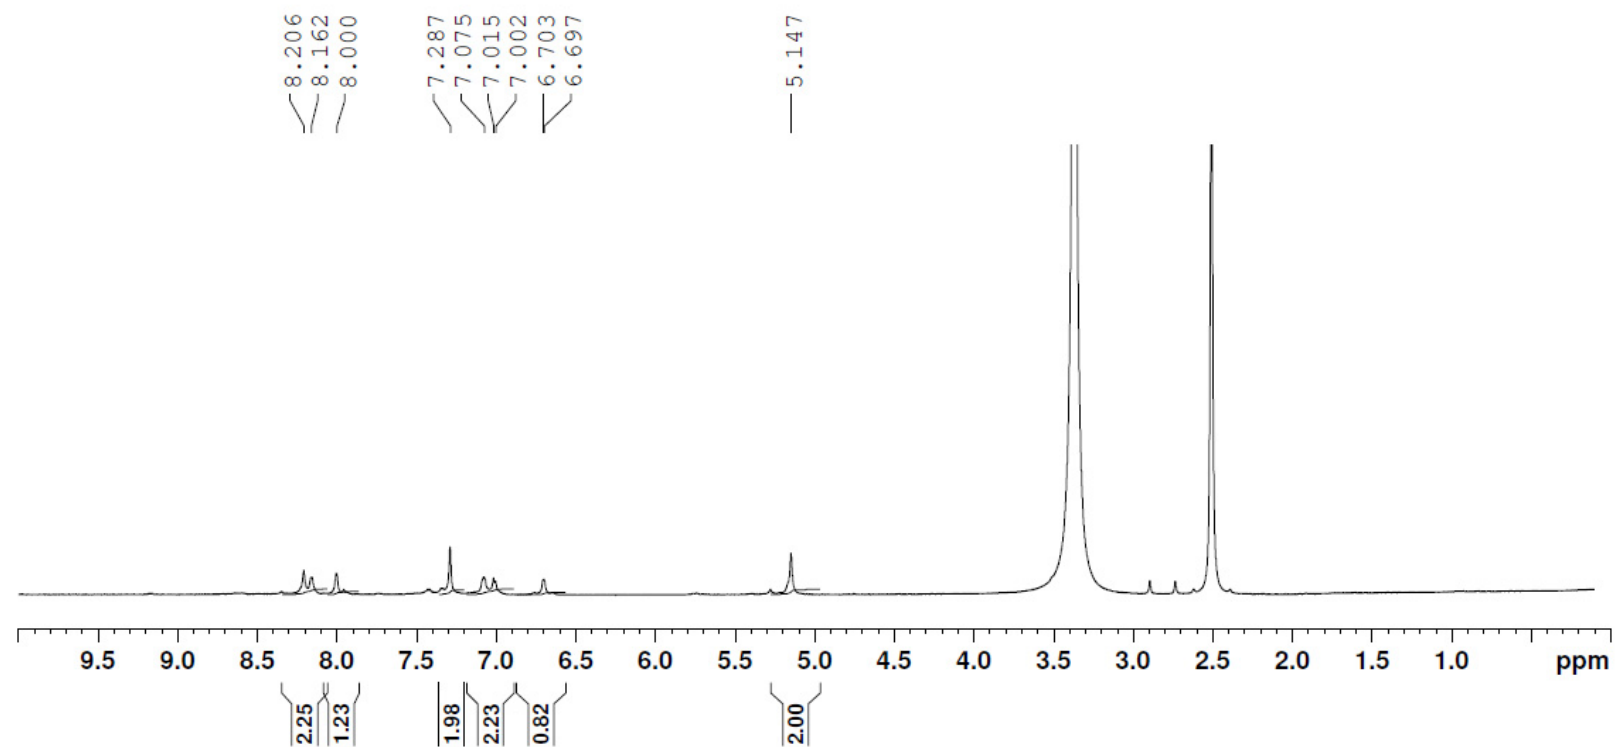



**Acquisition Parameter**

|             |          |                      |          |                  |           |
|-------------|----------|----------------------|----------|------------------|-----------|
| Source Type | ESI      | Ion Polarity         | Positive | Set Nebulizer    | 0.3 Bar   |
| Focus       | Active   | Set Capillary        | 3900 V   | Set Dry Heater   | 200 °C    |
| Scan Begin  | 50 m/z   | Set End Plate Offset | -500 V   | Set Dry Gas      | 4.0 l/min |
| Scan End    | 1000 m/z | Set Charging Voltage | 2000 V   | Set Divert Valve | Source    |
|             |          | Set Corona           | 0 nA     | Set APCI Heater  | 0 °C      |

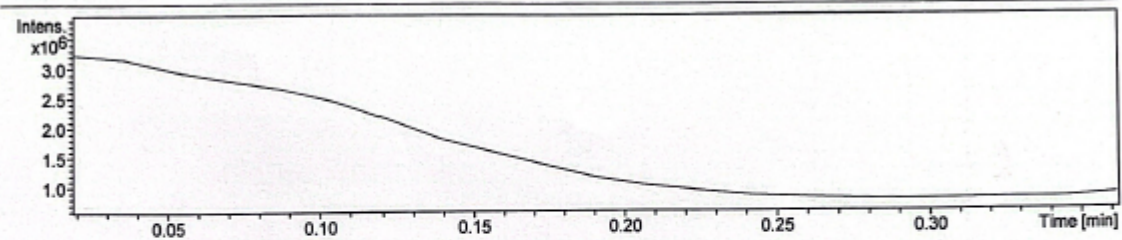**+MS, 0.1-0.3min #4-20**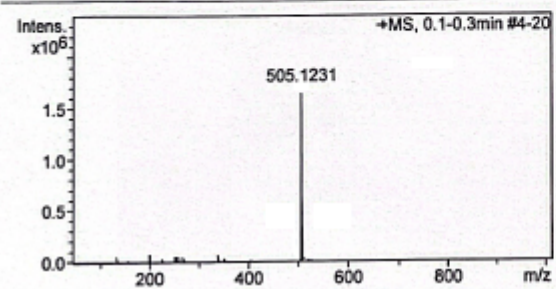

NMR spectra and HR MS of 2,6-bis((dipyrido[2,3-b:4',3'-e][1,4]thiazin-10-yl)methyl)pyridine (**4c**)

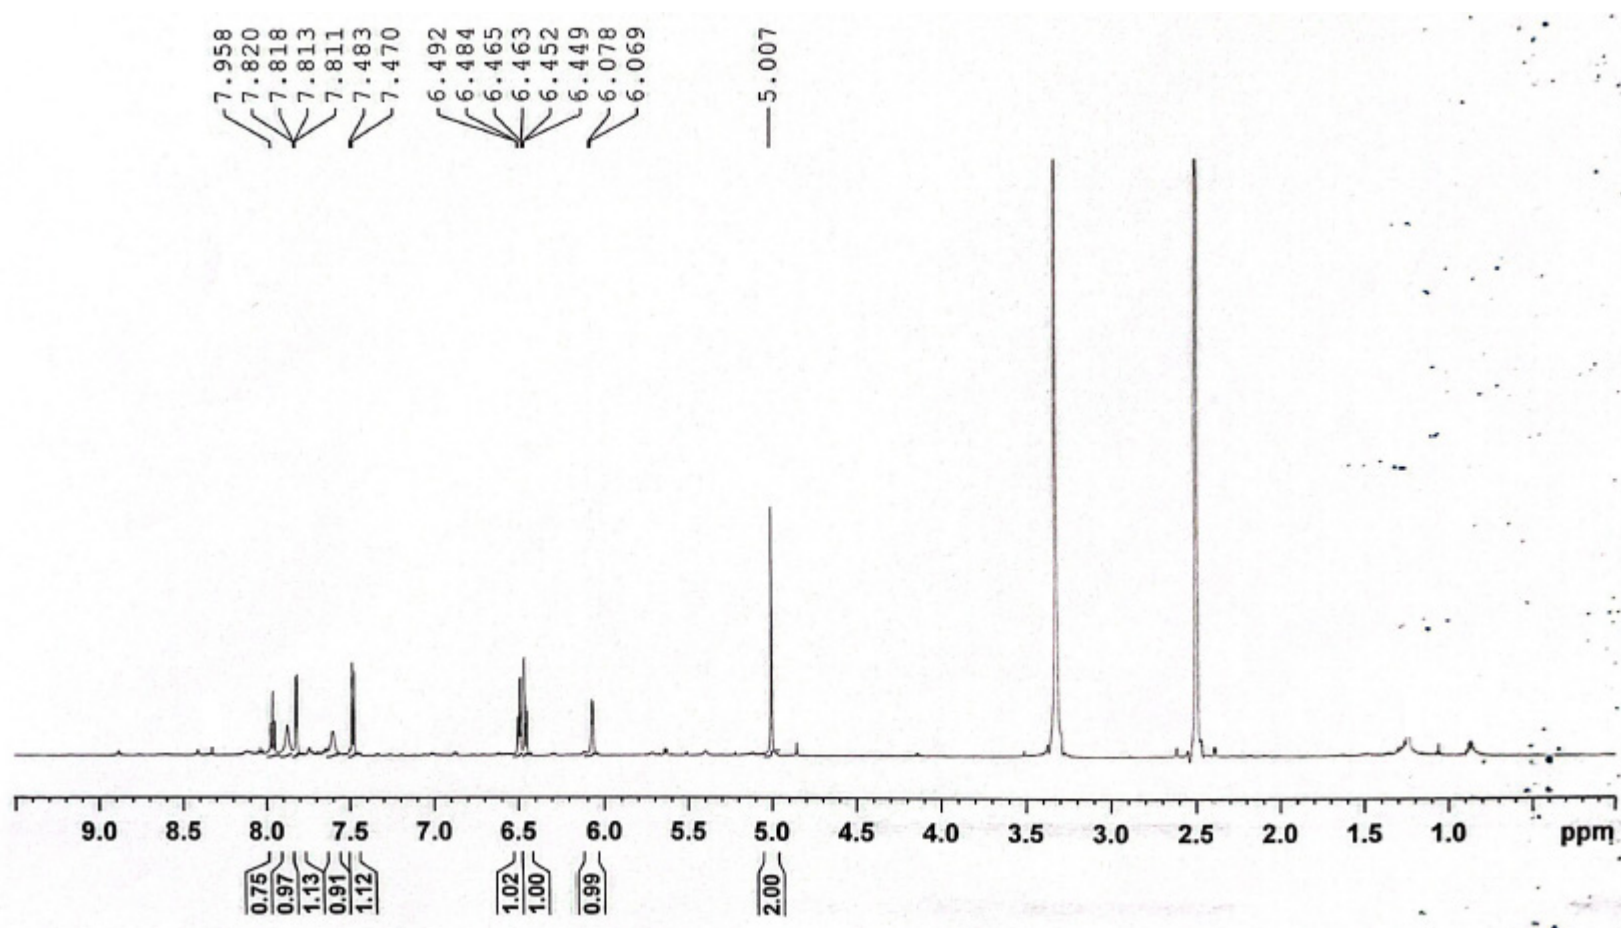

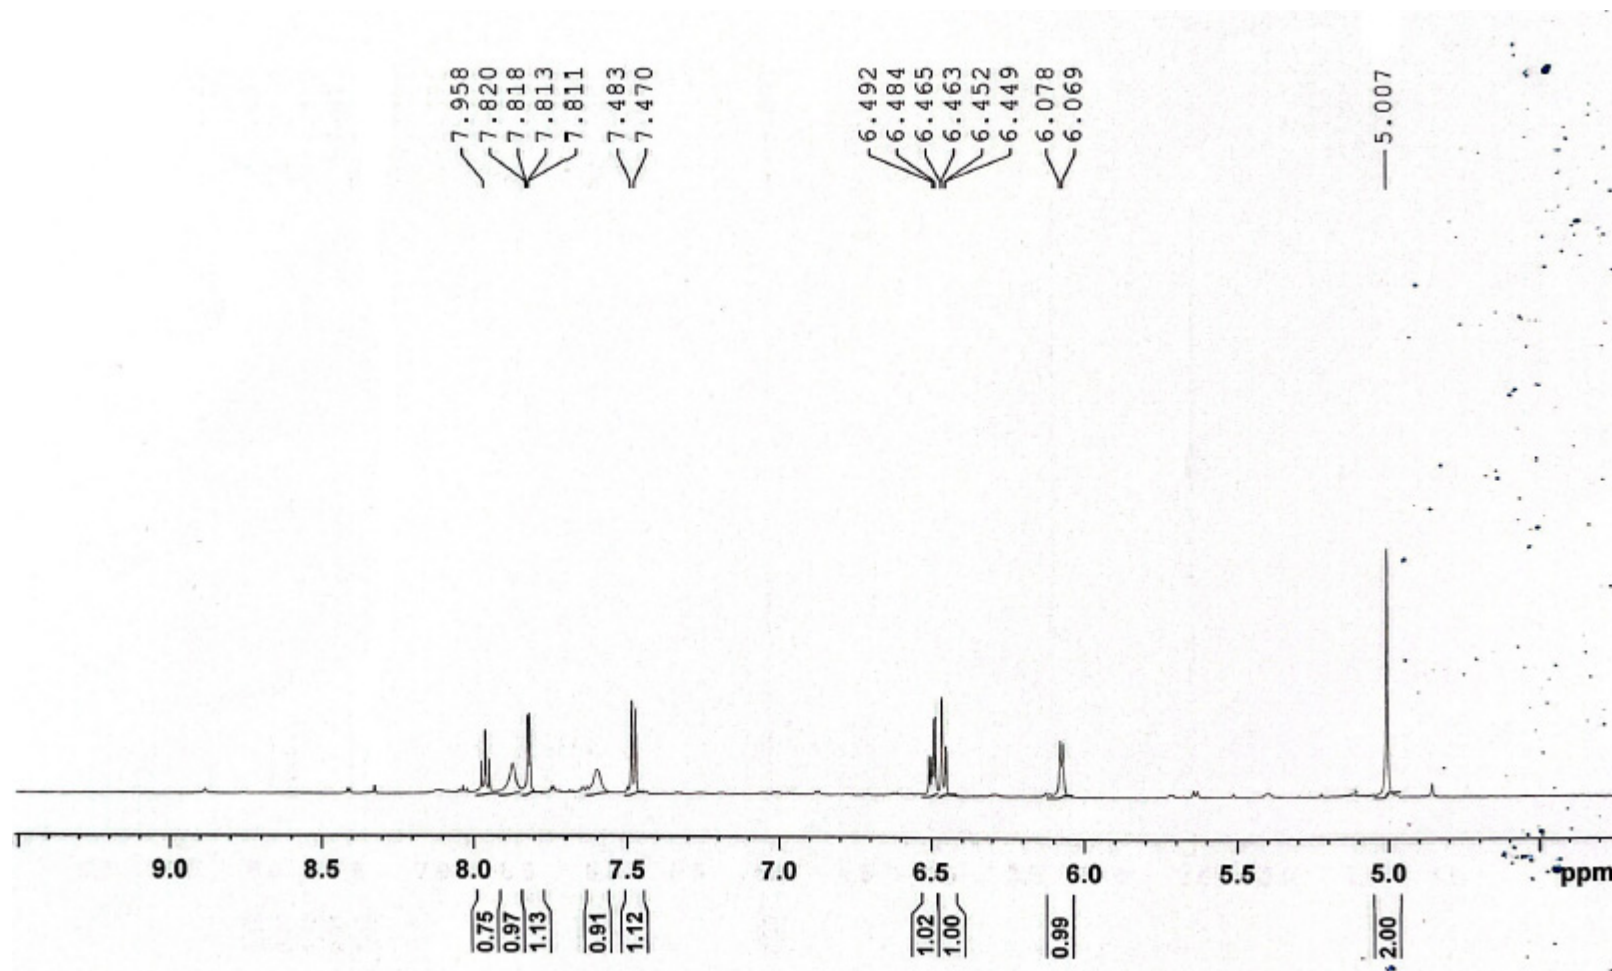

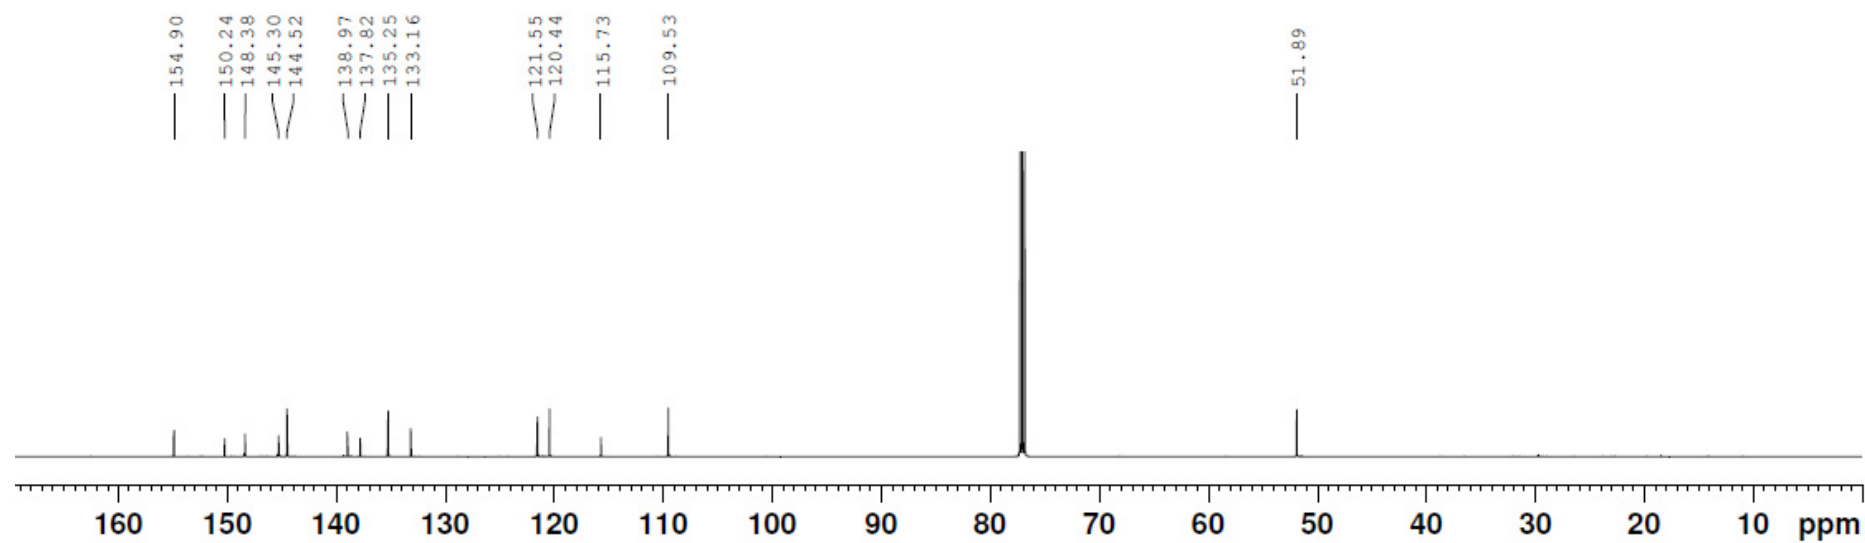

#### Acquisition Parameter

|             |          |                      |          |                  |           |
|-------------|----------|----------------------|----------|------------------|-----------|
| Source Type | ESI      | Ion Polarity         | Positive | Set Nebulizer    | 0.3 Bar   |
| Focus       | Active   | Set Capillary        | 3900 V   | Set Dry Heater   | 200 °C    |
| Scan Begin  | 50 m/z   | Set End Plate Offset | -500 V   | Set Dry Gas      | 4.0 l/min |
| Scan End    | 1000 m/z | Set Charging Voltage | 2000 V   | Set Divert Valve | Source    |
|             |          | Set Corona           | 0 nA     | Set APCI Heater  | 0 °C      |

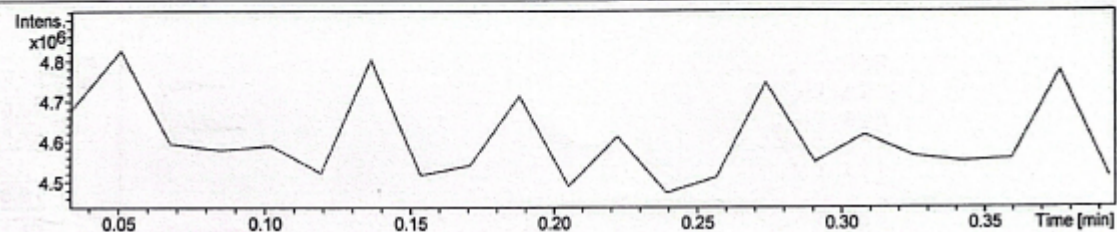

#### +MS, 0.3-0.4min #16-21

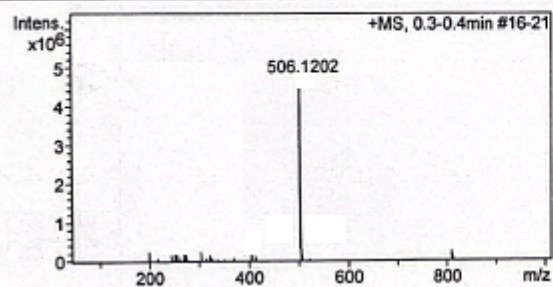

Supplement: s1 [file s1]
